# Supplementary material for: A novel cervix carcinoma biomarker: Pathological-epigenomics, integrated analysis of MethylMix algorithm and pathology for predicting response to cancer immunotherapy
Source: Frontiers journal article supplement (doi:10.3389/fonc.2022.1053800), 2022-11-02
Supplement: Data_Sheet_1.ZIP [file Data_Sheet_1.ZIP]

0

1

2

3

4

5

6

GPX2

CENPW

AKR1C2

MMP1

IGFBP3

ANGPTL4

IVL

KRTDAP

KRT6C

GZMA

CCL5

GNLY

IL36G

LINC00520

CXCL8

LYZ

C1QB

SPP1

LYPD2

SPRR3

SPRR2E
