# Supplementary material for: A novel cervix carcinoma biomarker: Pathological-epigenomics, integrated analysis of MethylMix algorithm and pathology for predicting response to cancer immunotherapy
Source: Frontiers journal article supplement (doi:10.3389/fonc.2022.1053800), 2022-11-02
Supplement: Data_Sheet_1.ZIP [file drivenGene.xls]

gene	normalMean	TumorMean	logFC	pValue	cor	corPavlue
PDX1	0.161373969848109	0.435974697122975	1.43383652110423	0.00336915938502963	-0.421044740307917	1.40566338697795e-14
CYP4F11	0.584932507351285	0.380205918889653	-0.621489176965195	0.00366187967226796	-0.505546270574528	2.94407482841035e-21
ACSL1	0.226085153124156	0.120784927873146	-0.904425814848658	0.00366188313019369	-0.376474730294412	9.70044999811504e-12
MAL	0.160351865292247	0.399289274361208	1.31619318304928	0.00397760926986851	-0.47246556623305	2.02281098684414e-18
TSTD1	0.679735453086149	0.430490605167967	-0.658991618443426	0.00431783161269591	-0.41301404991814	4.91145011508762e-14
TM4SF1	0.582307413345253	0.361528545290426	-0.68767142294482	0.00487778645821226	-0.564140377722462	4.13398889926898e-27
KLHDC7A	0.593922770693918	0.372014512470983	-0.674916443192031	0.00487779949203144	-0.476714945489894	9.08883001141018e-19
KCNN2	0.104304686201541	0.506532222563247	2.27985007088703	0.00539373696106353	-0.441923939620297	4.63198944632581e-16
RAB25	0.616513943133928	0.364021271177947	-0.760110767949273	0.00595846190257814	-0.487657189159428	1.09963629993078e-19
ZNF502	0.11456310384406	0.395590695827888	1.78786600974684	0.0114298305466225	-0.797305137946732	1.25986634594408e-68
FAM117A	0.0619663583342556	0.108474551382223	0.807799528631432	0.0189022313257233	-0.414030634302488	4.19981989420559e-14
MYEF2	0.305382975829671	0.527744105861394	0.789218922320641	0.019571372205628	-0.626179752879666	1.00842109264688e-34
PF4V1	0.33814363267766	0.562576197111085	0.734412325035696	0.0298462325729138	-0.492323668668267	4.36473413002827e-20
MUC20	0.6428591082559	0.404395151018837	-0.668736886577648	0.0368242739507942	-0.652195818967898	1.8711626277532e-38
