# Supplementary material for: A novel cervix carcinoma biomarker: Pathological-epigenomics, integrated analysis of MethylMix algorithm and pathology for predicting response to cancer immunotherapy
Source: Frontiers journal article supplement (doi:10.3389/fonc.2022.1053800), 2022-11-02
Supplement: Data_Sheet_1.ZIP [file raw OD.xlsx]

## Sheet: Sheet1
0.387	0.376	0.369		0.376	0.353	0.387		0.369	0.375	0.392
0.486	0.501	0.515		0.522	0.546	0.561		0.445	0.503	0.471
0.785	0.758	0.847		0.926	1.013	0.917		0.554	0.612	0.586
1.102	1.195	1.233		1.476	1.391	1.529		0.791	0.732	0.708
