# Supplementary figures and images for: A novel cervix carcinoma biomarker: Pathological-epigenomics, integrated analysis of MethylMix algorithm and pathology for predicting response to cancer immunotherapy
Source: Frontiers journal article supplement (doi:10.3389/fonc.2022.1053800), 2022-11-02

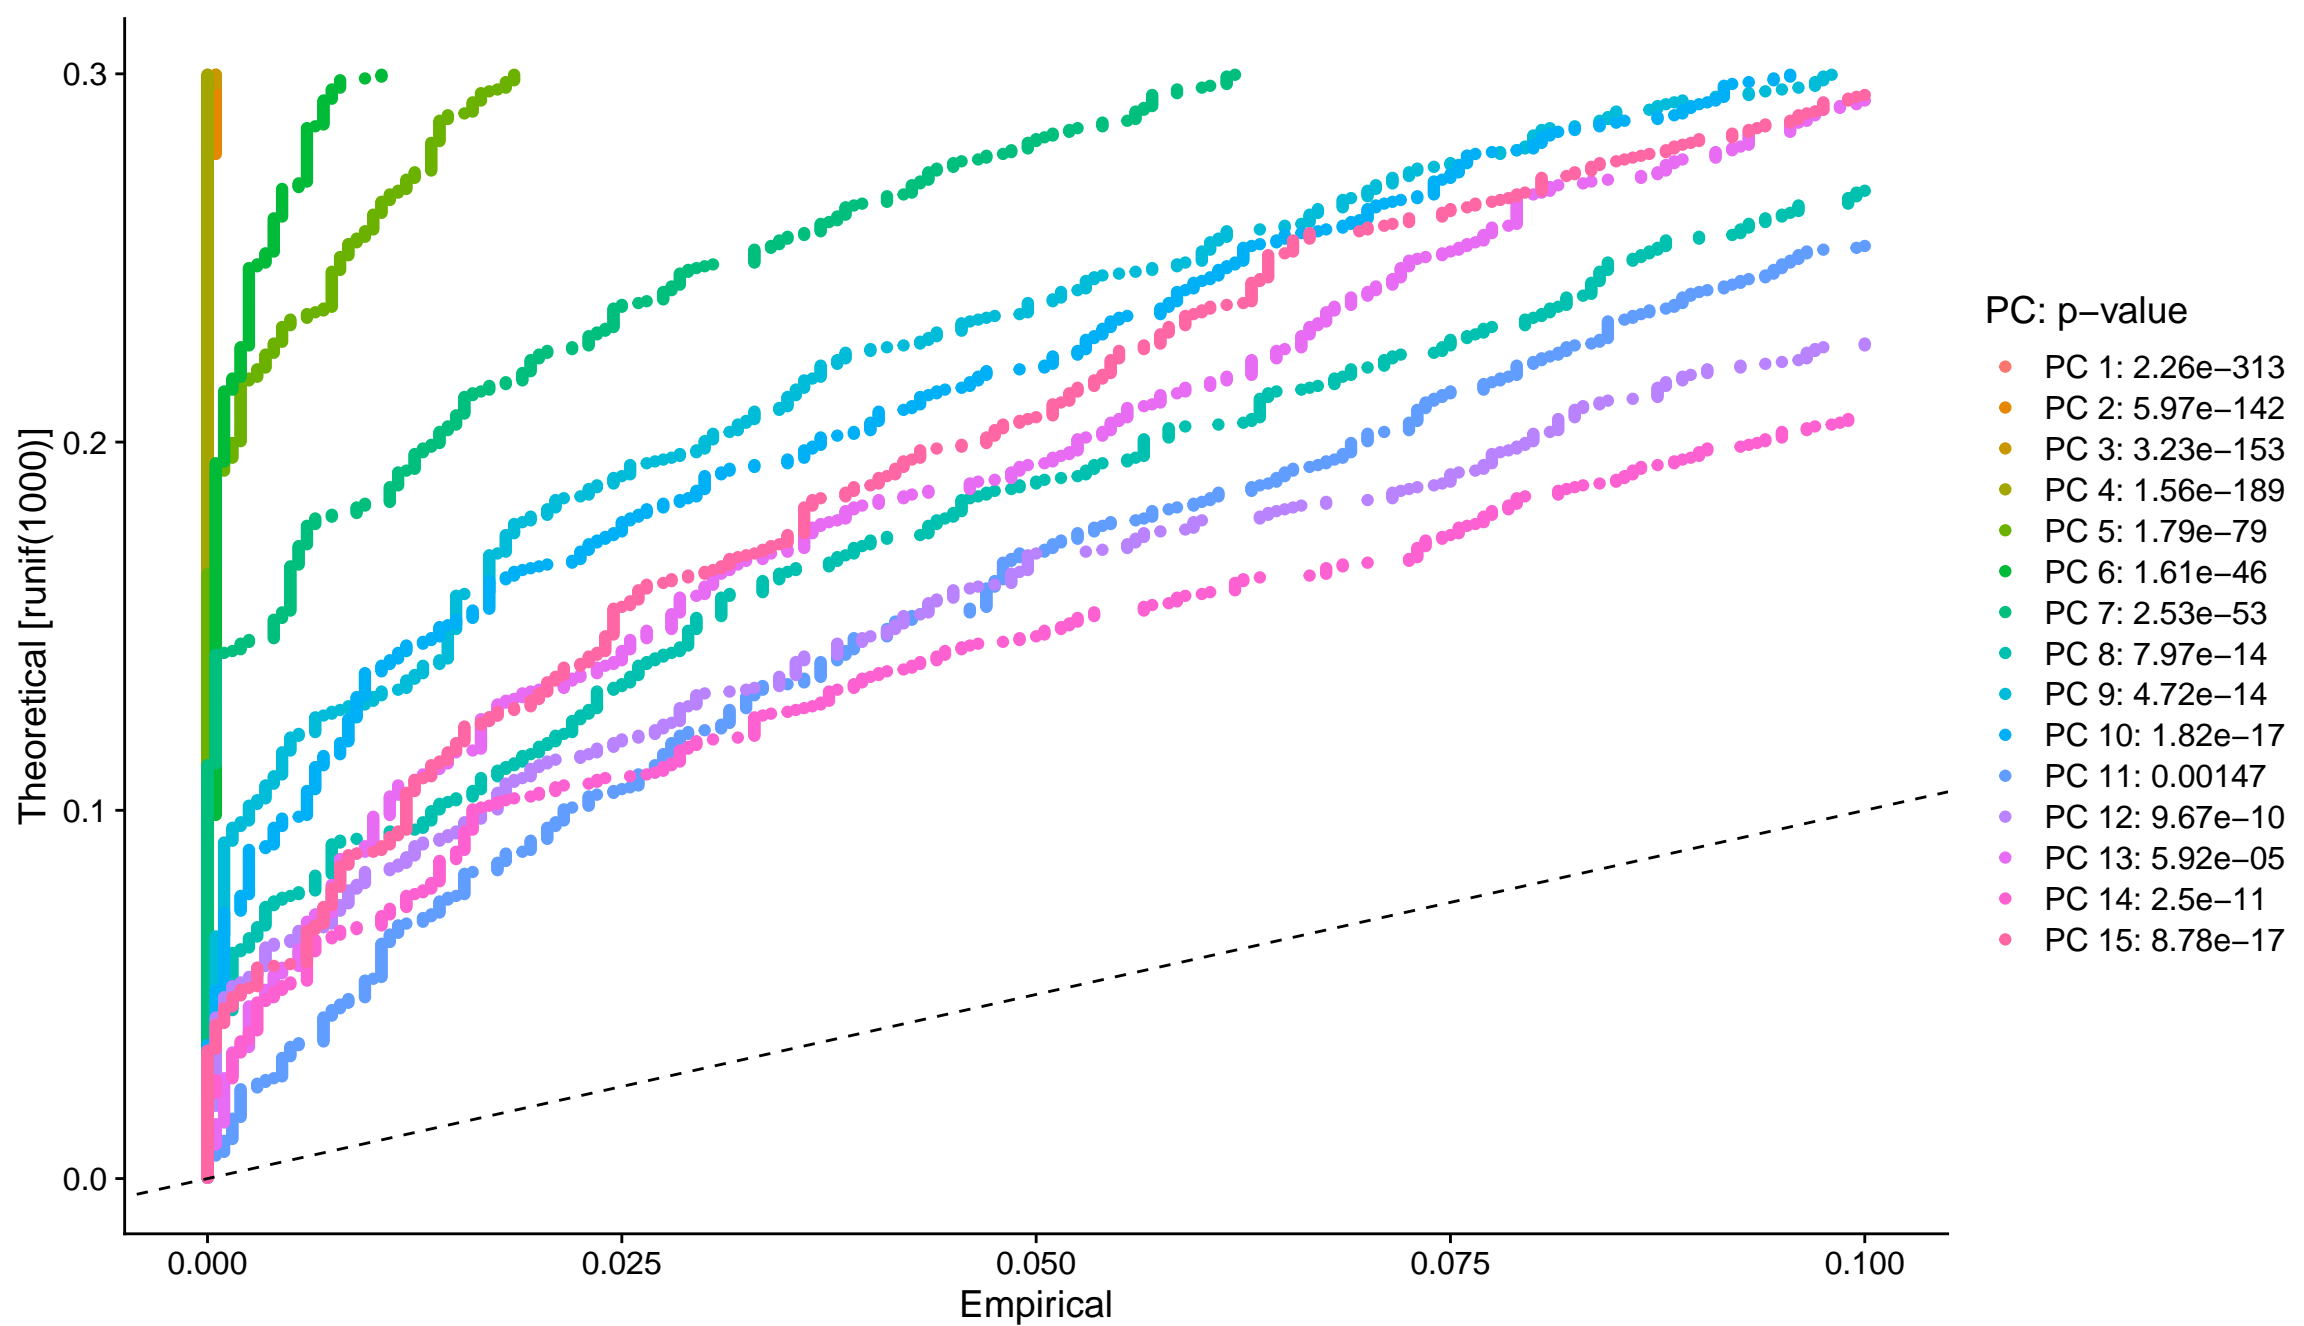

Supplement: Data_Sheet_1.ZIP [file Data_Sheet_1.ZIP]

Cancer cell

Stromal cell

Immune cell

Epithelial cell

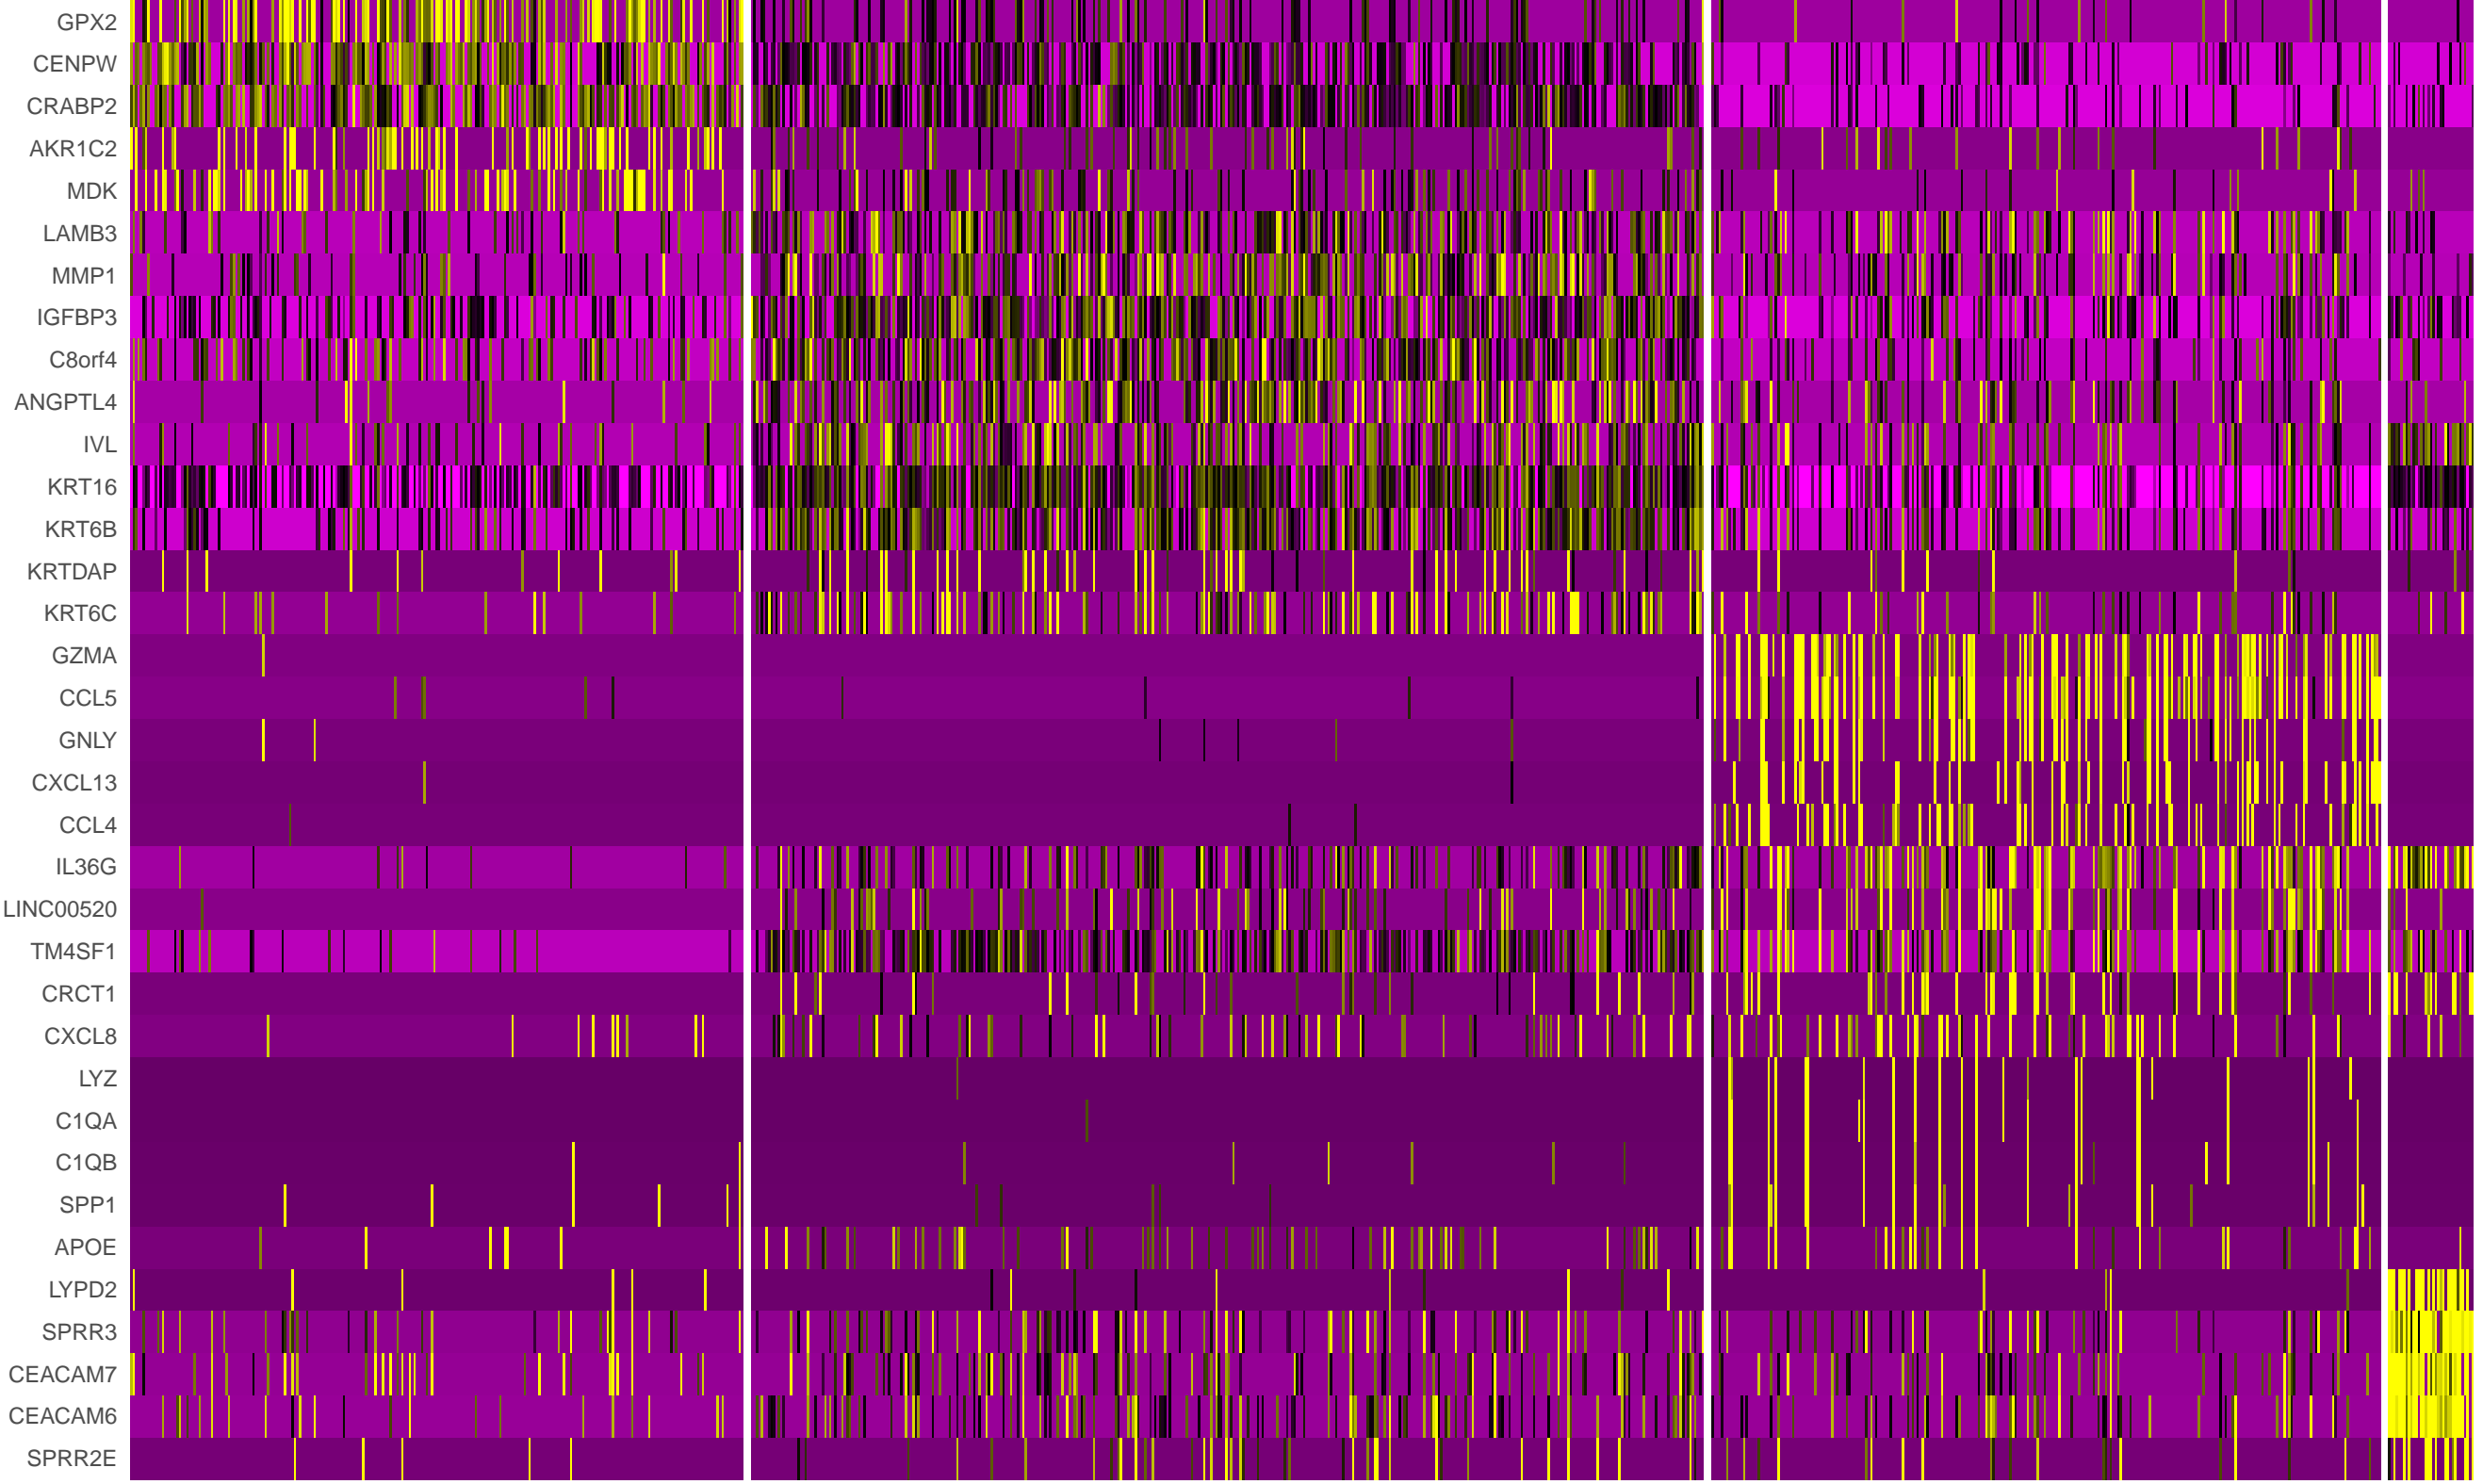

Supplement: Data_Sheet_1.ZIP [file Data_Sheet_1.ZIP]

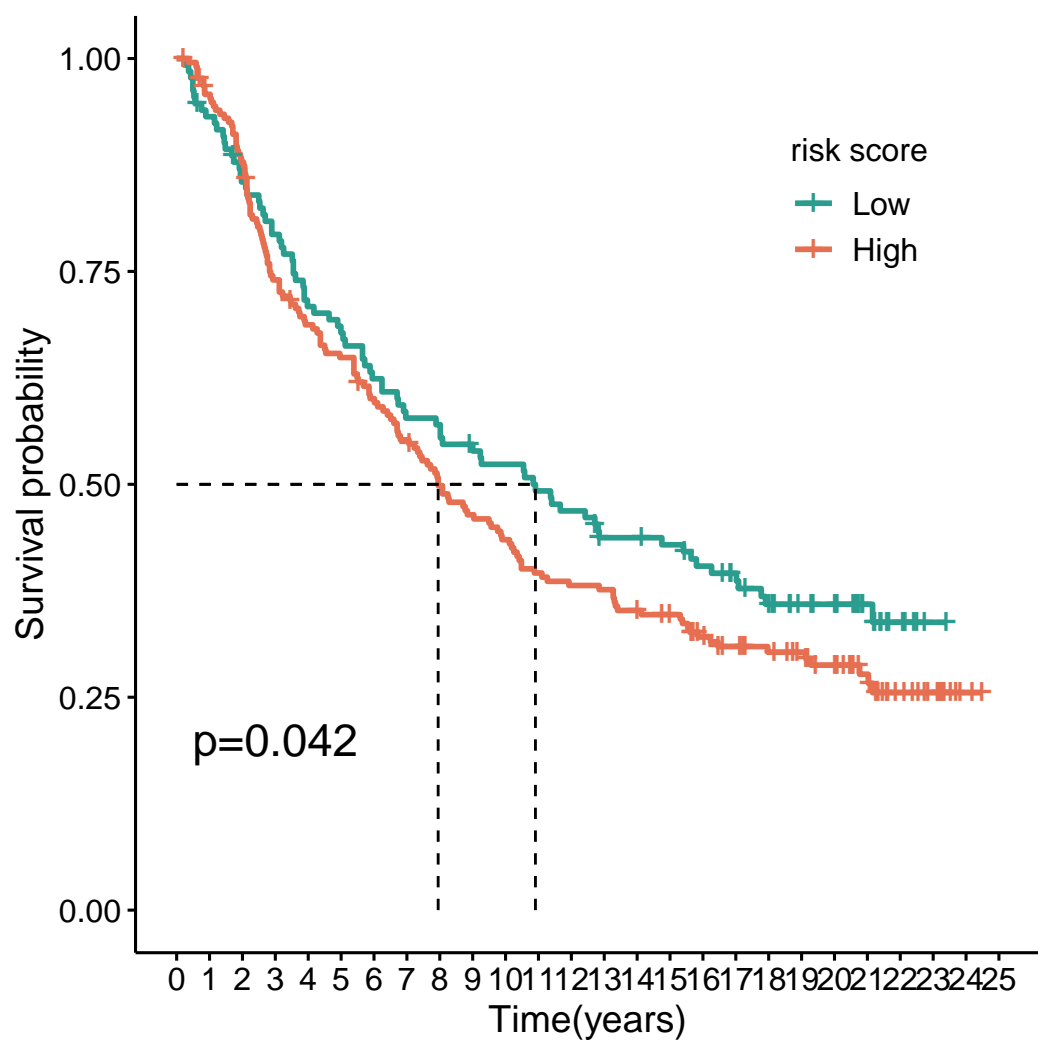

Supplement: Data_Sheet_1.ZIP [file Data_Sheet_1.ZIP]

Response  CR/PR  SD/PD

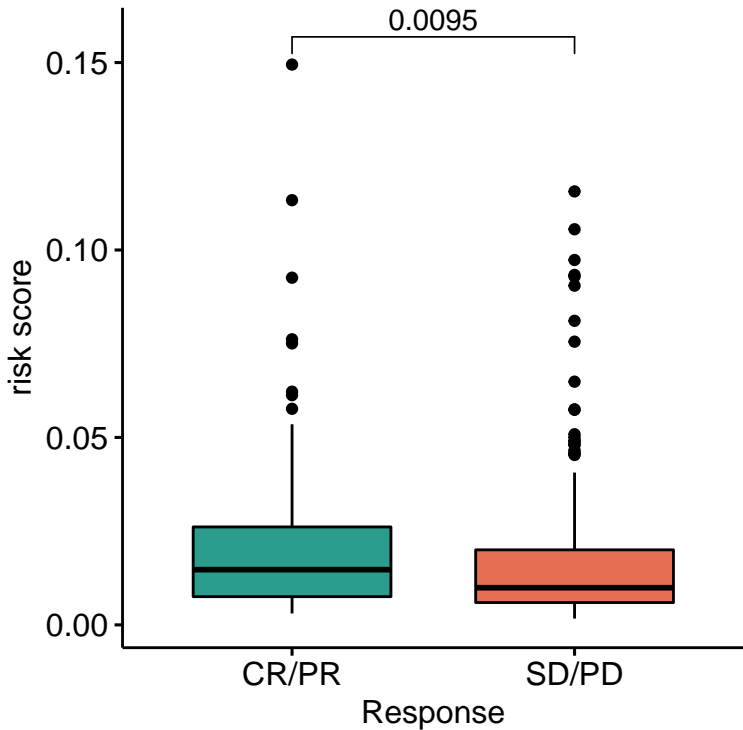

Supplement: Data_Sheet_1.ZIP [file Data_Sheet_1.ZIP]

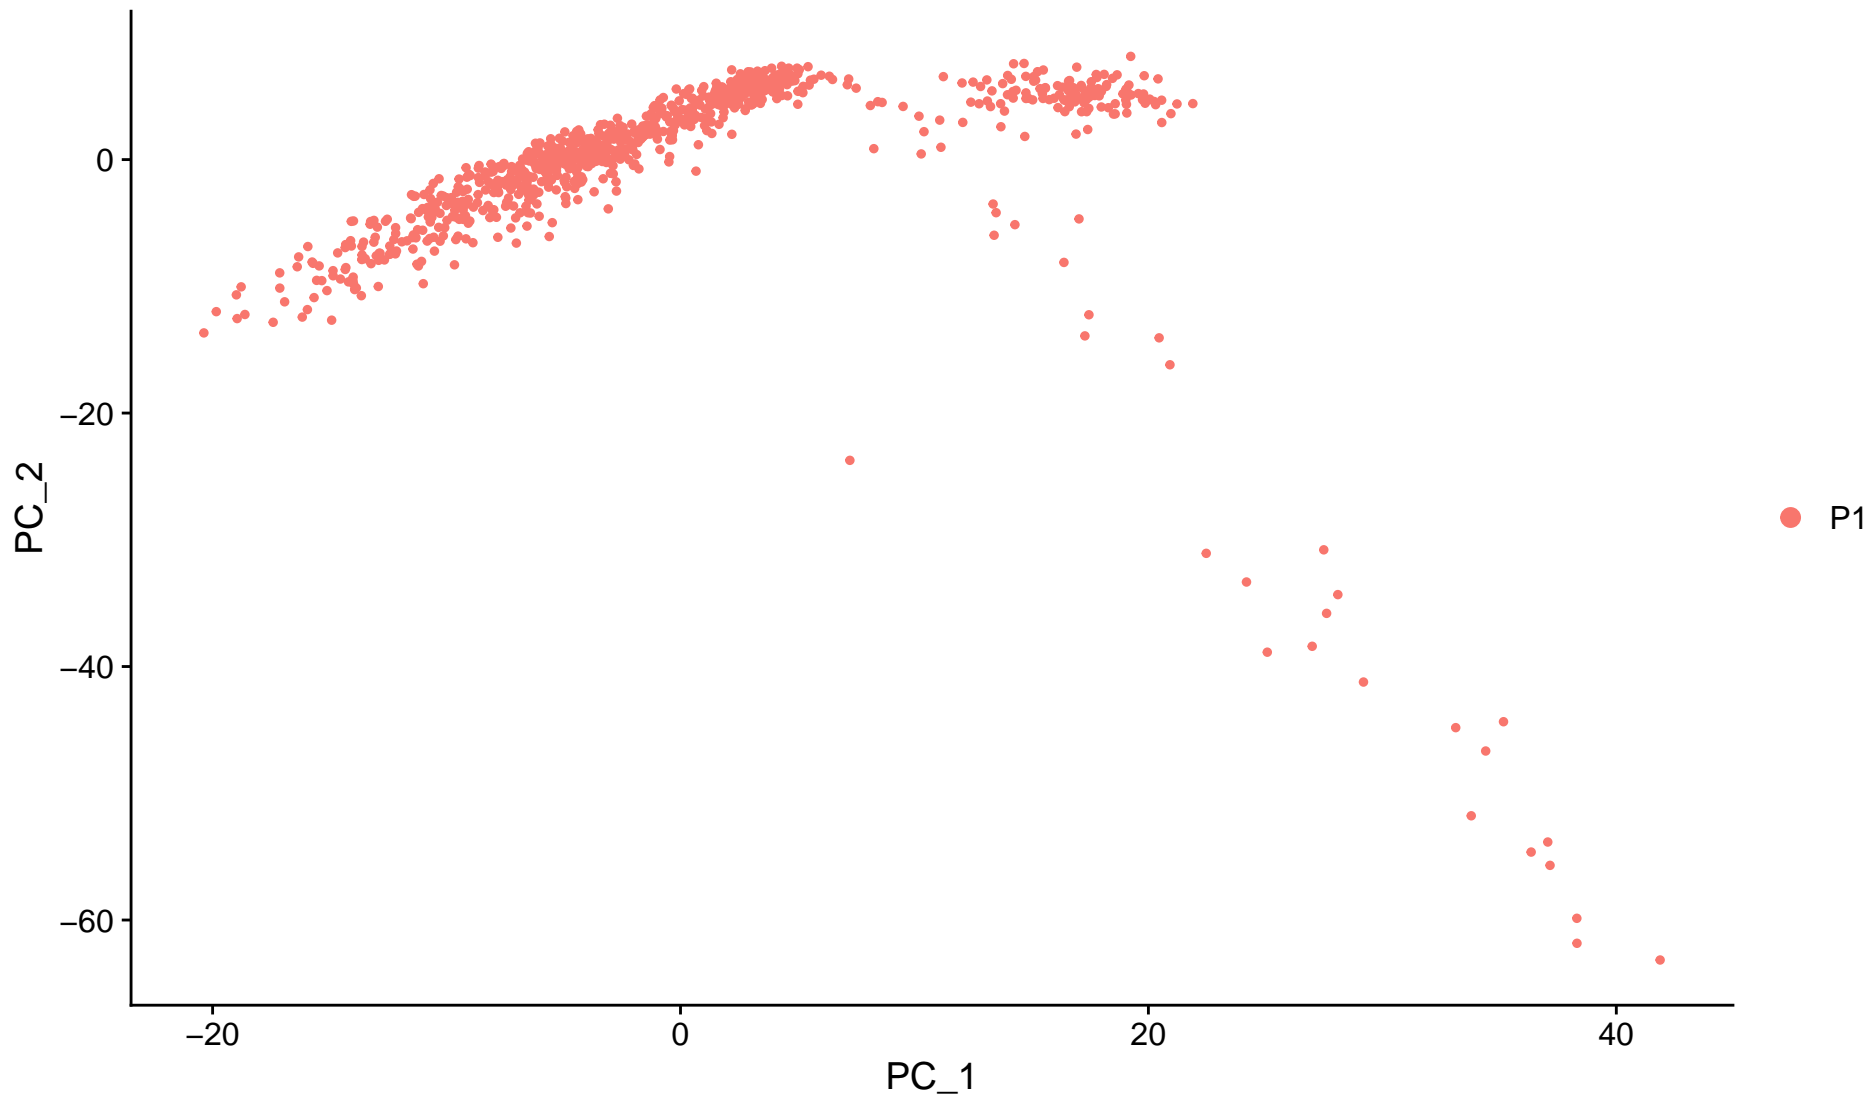

Supplement: Data_Sheet_1.ZIP [file Data_Sheet_1.ZIP]

**0.94**

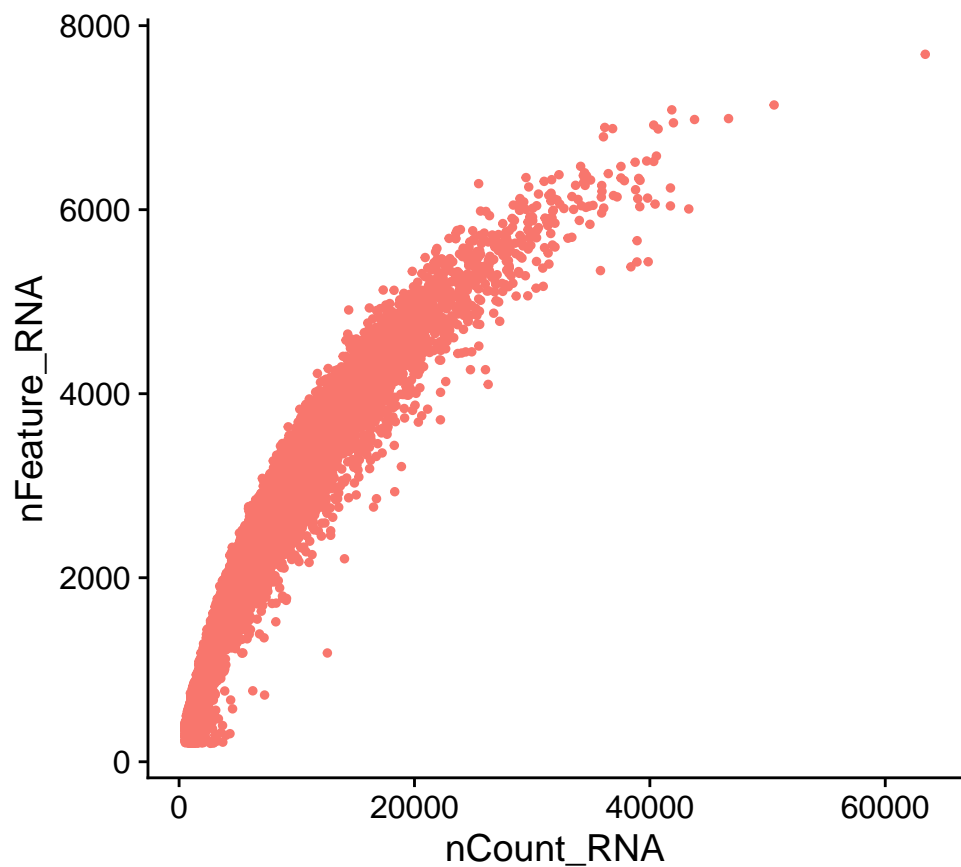

**0.01**

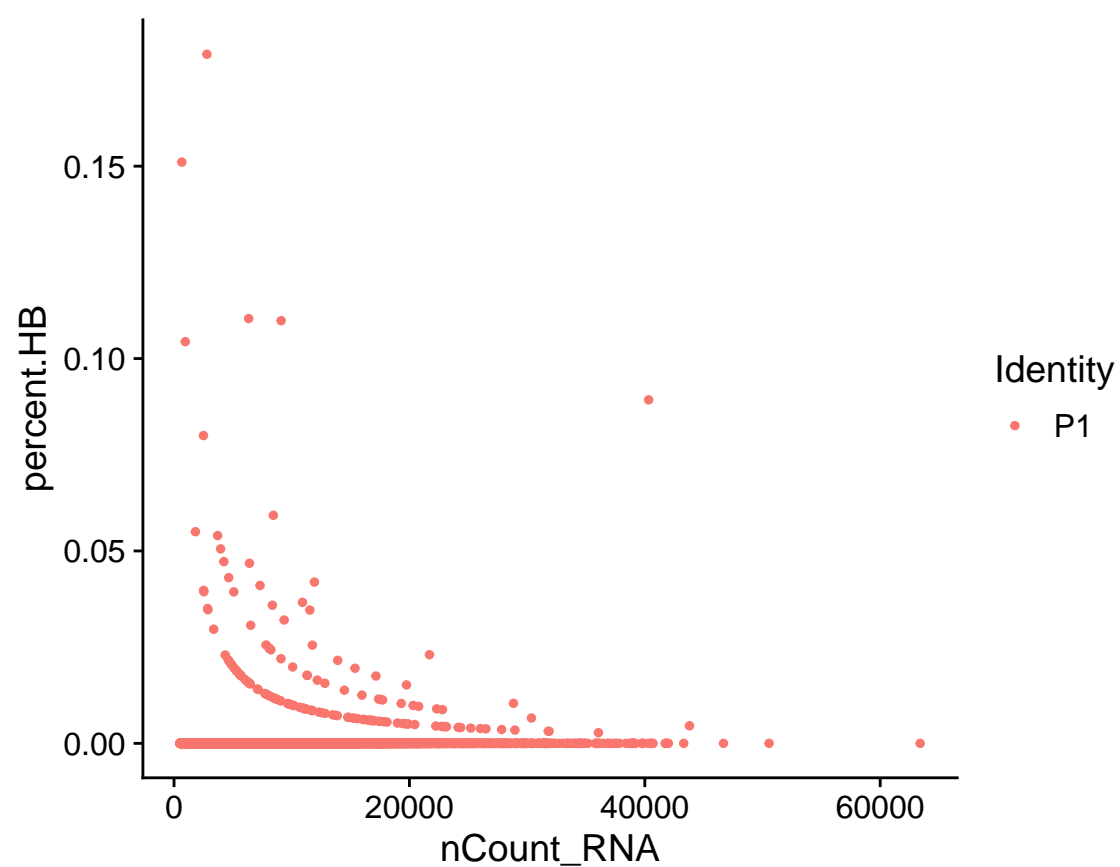

**-0.23**

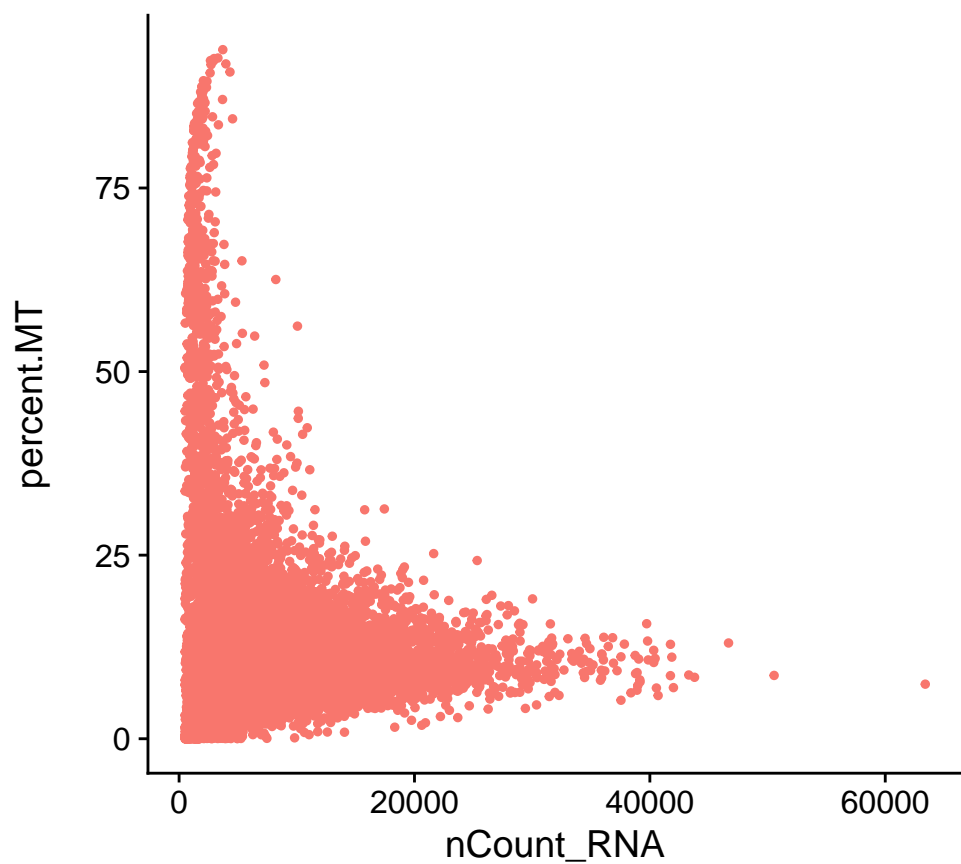

**0.24**

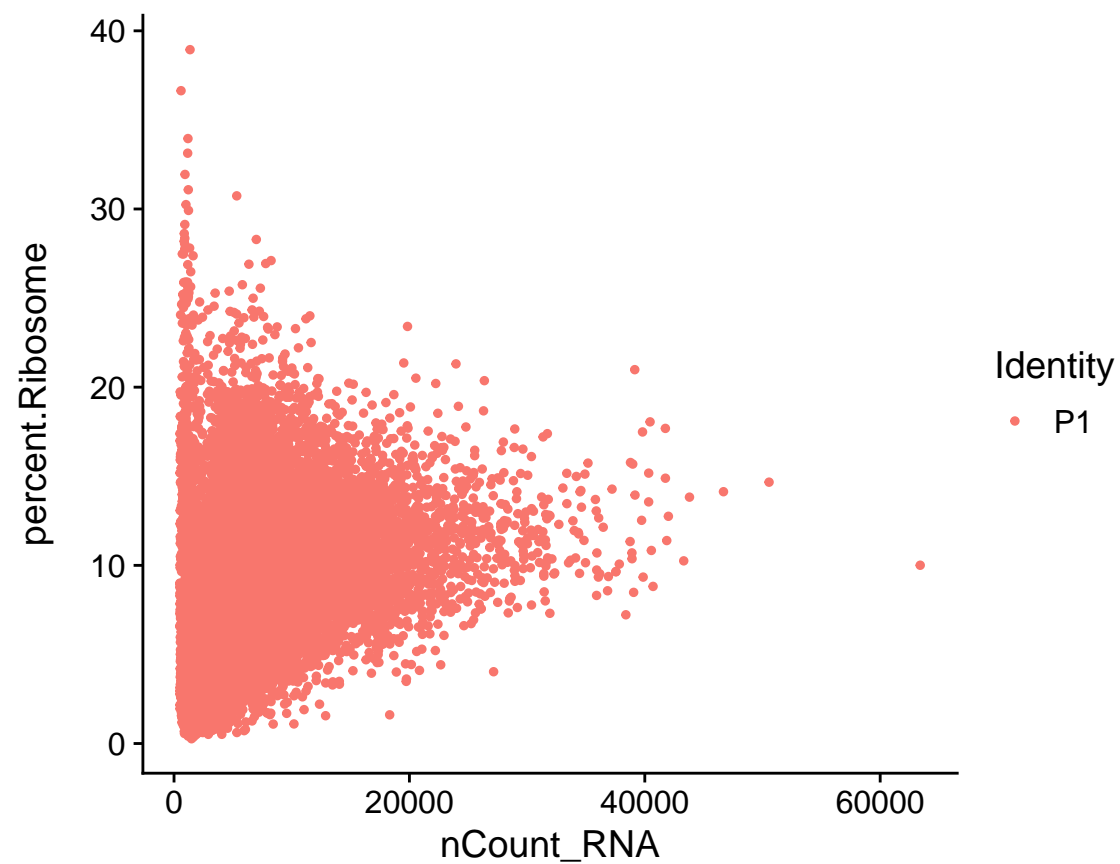

Supplement: Data_Sheet_1.ZIP [file Data_Sheet_1.ZIP]

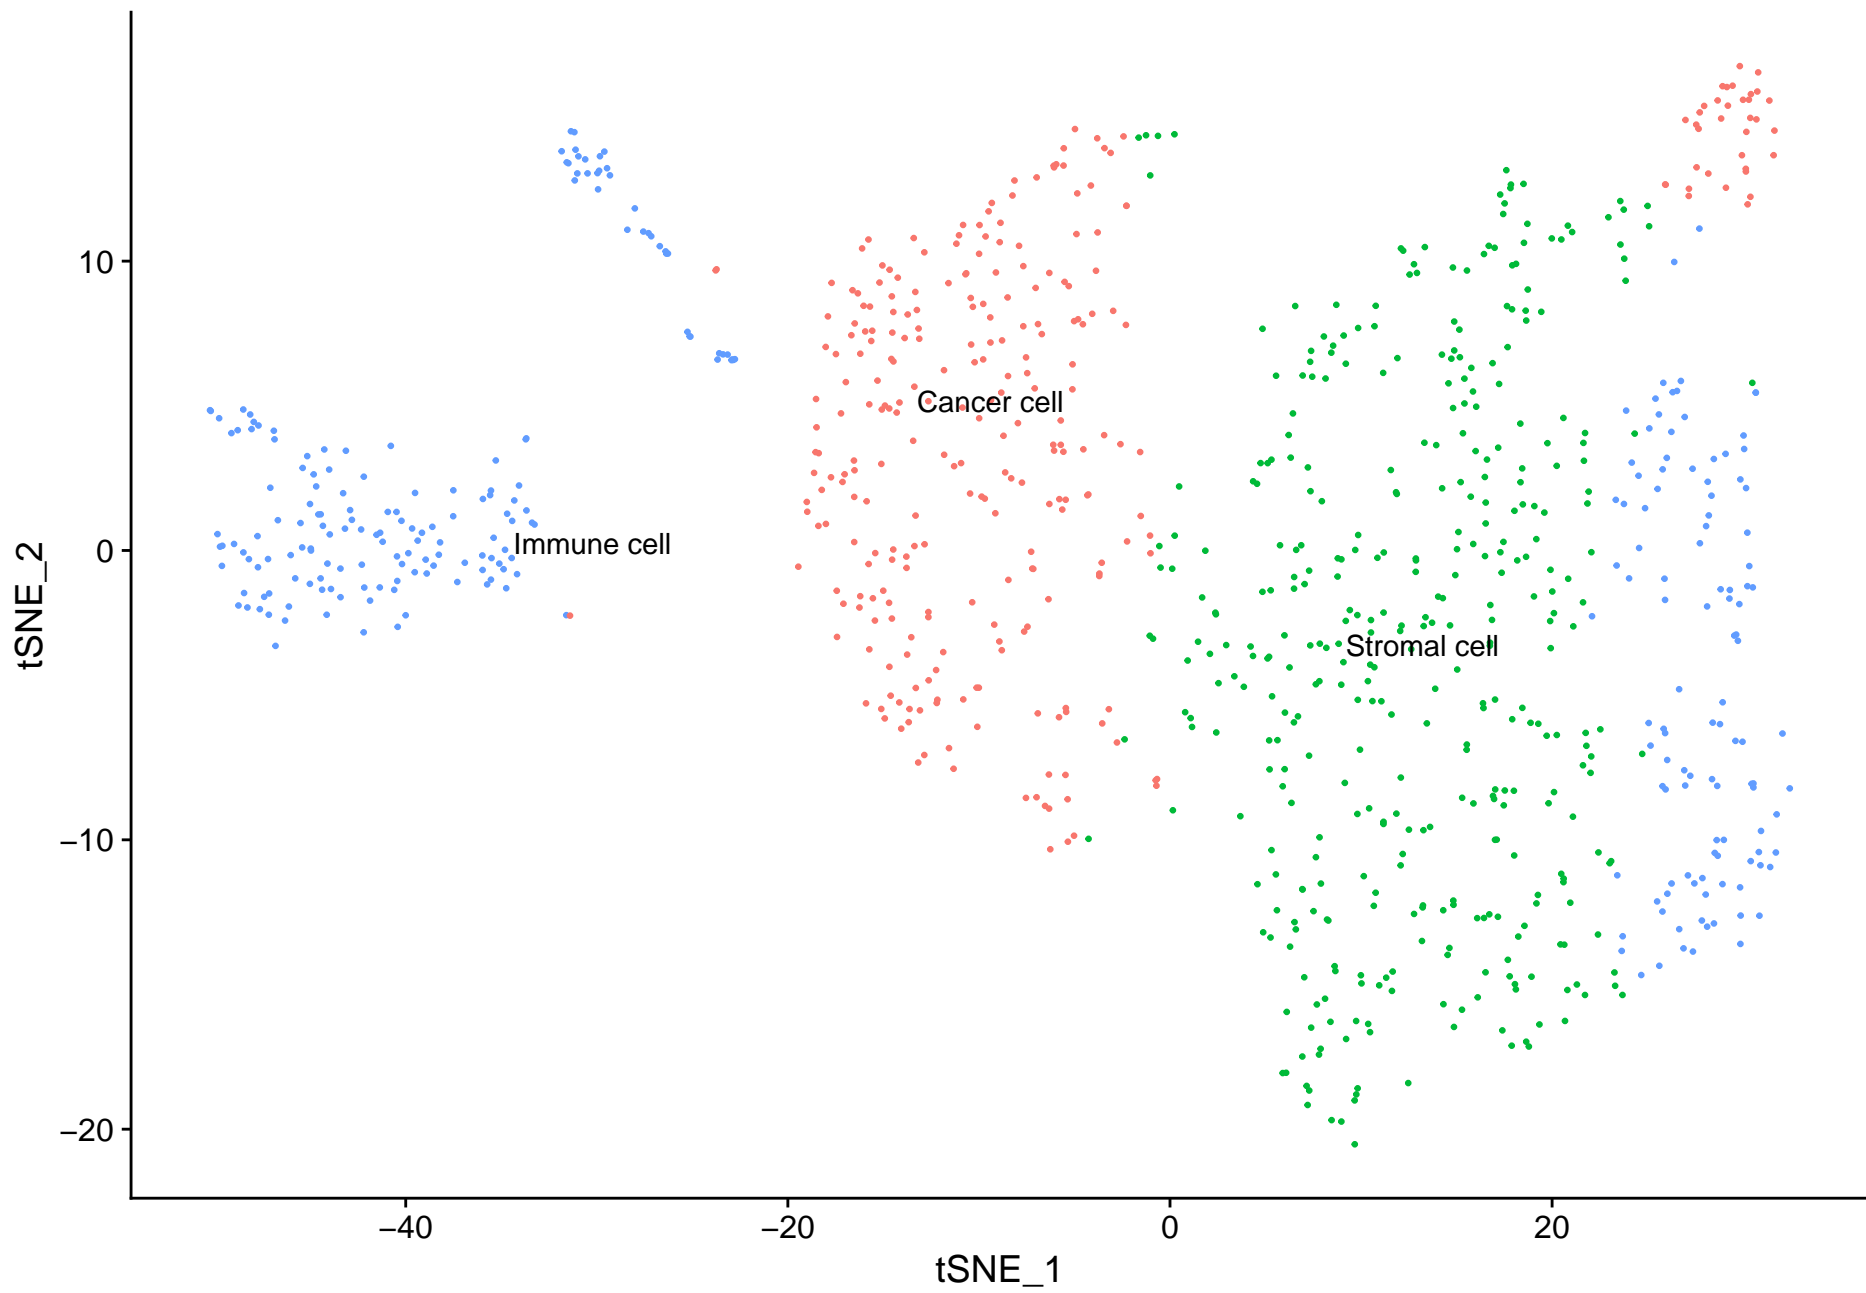

Supplement: Data_Sheet_1.ZIP [file Data_Sheet_1.ZIP]

Percent weight

100  
75  
50  
25  
0

Low

High

Risk score

Response

CR/PR  
SD/PD

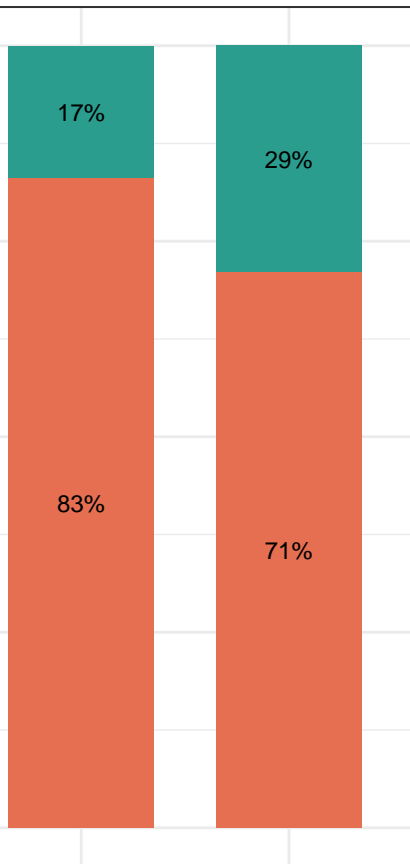

Supplement: Data_Sheet_1.ZIP [file Data_Sheet_1.ZIP]

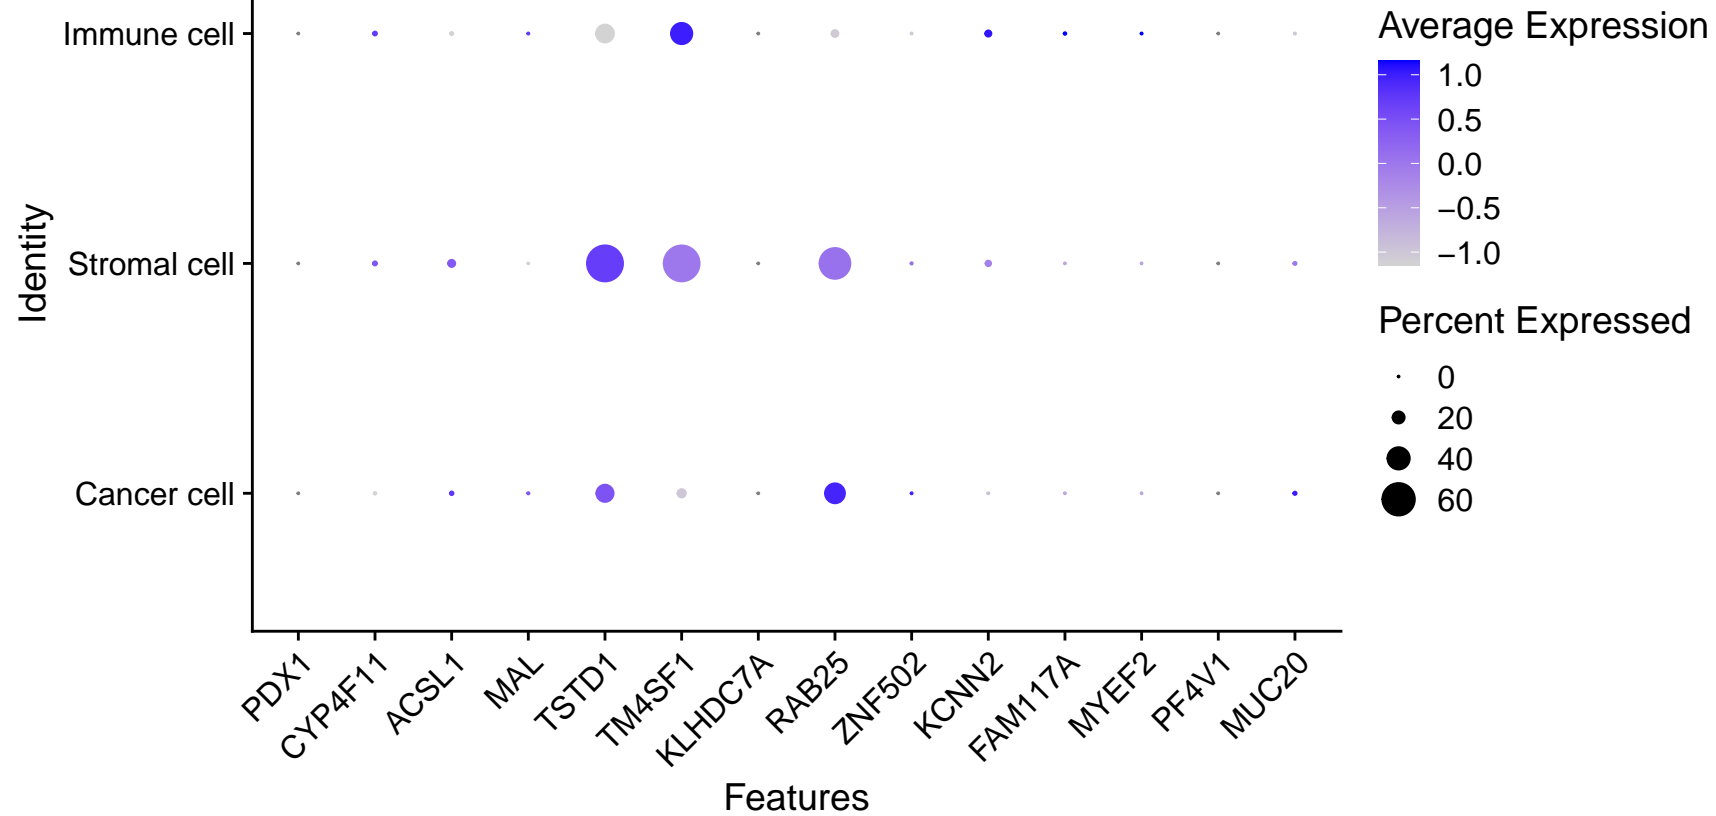

Supplement: Data_Sheet_1.ZIP [file Data_Sheet_1.ZIP]

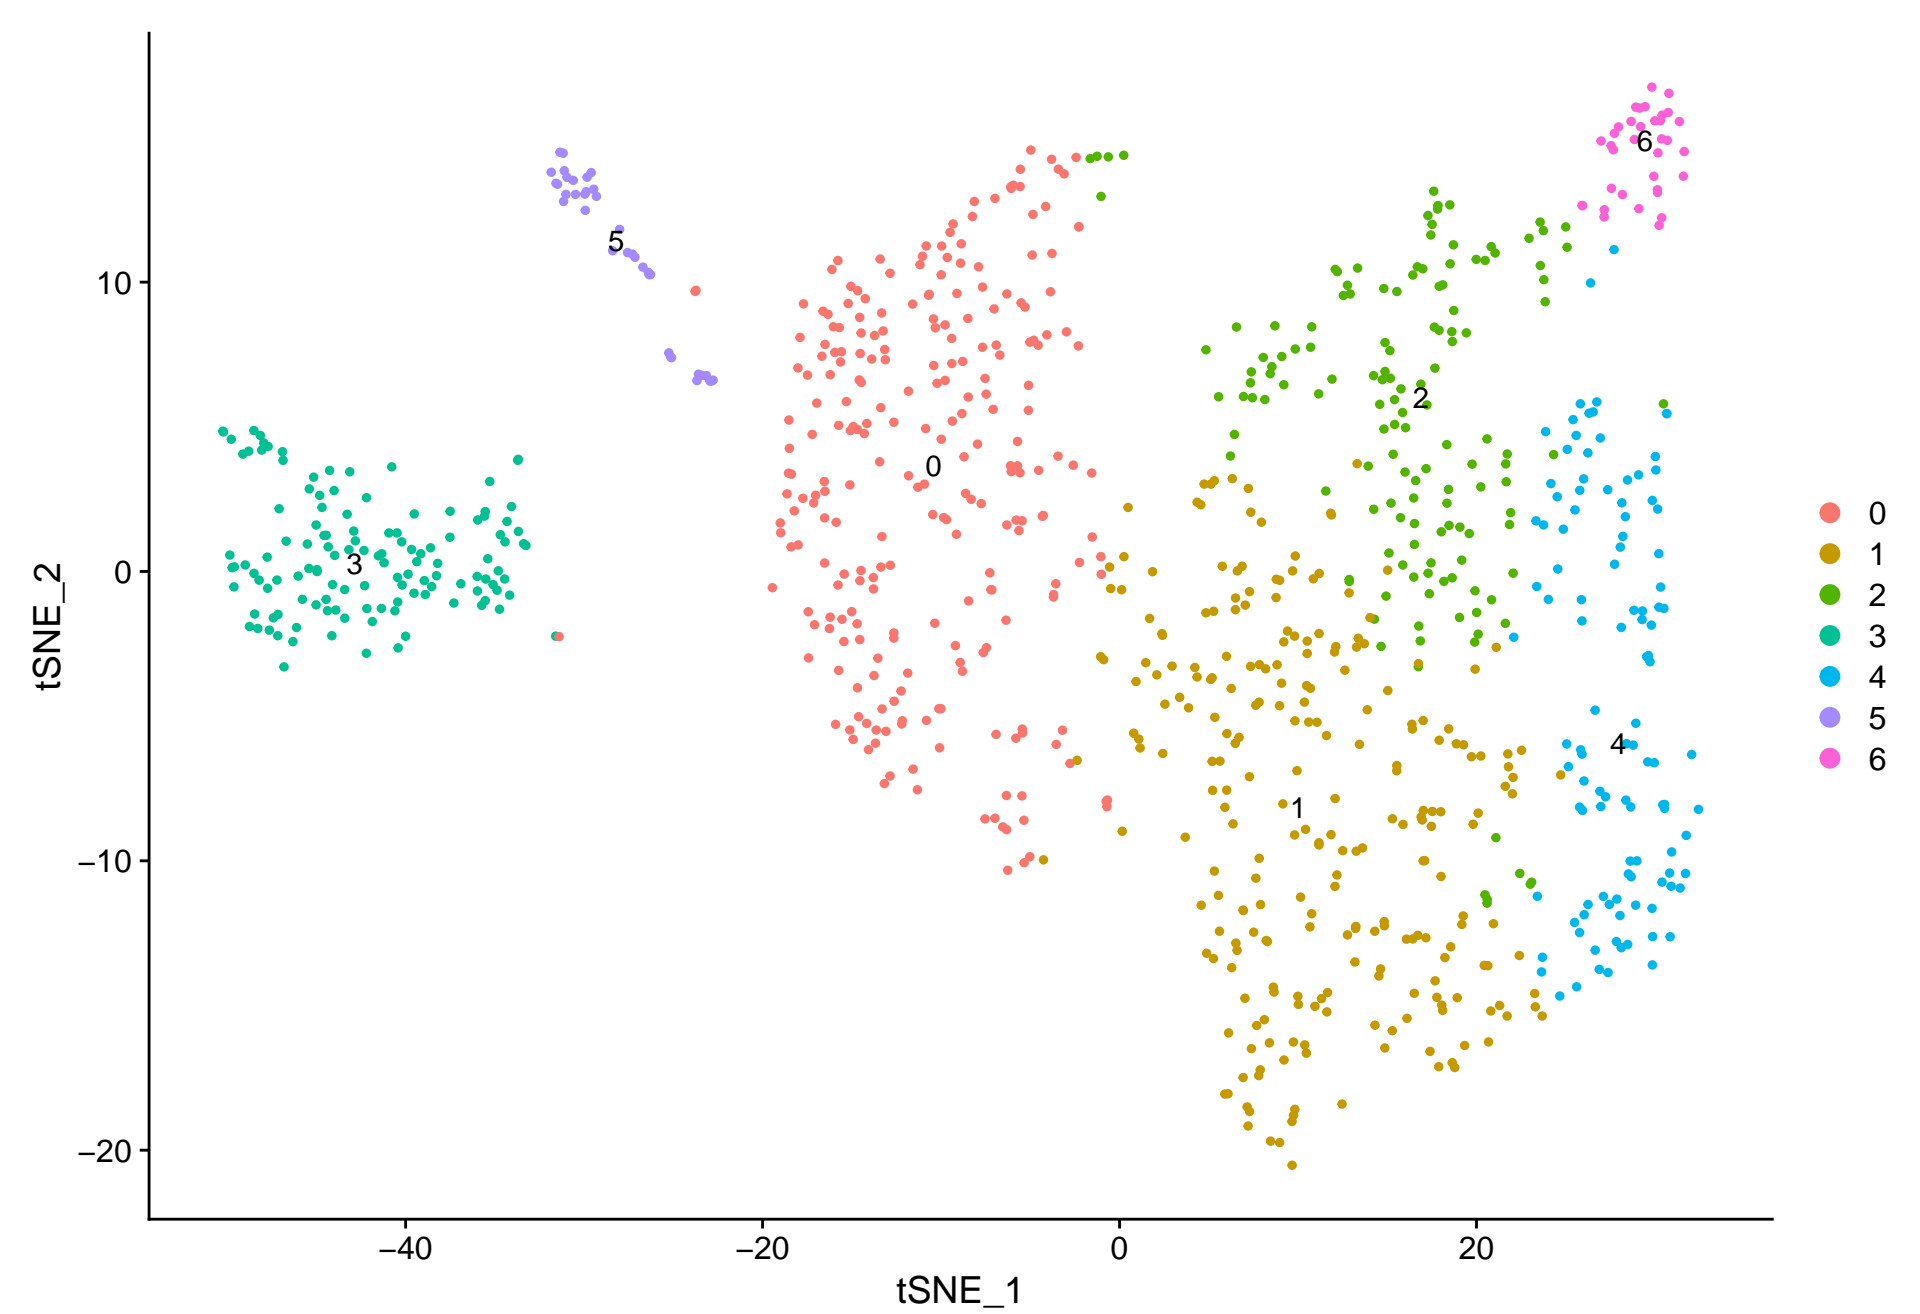

Supplement: Data_Sheet_1.ZIP [file Data_Sheet_1.ZIP]

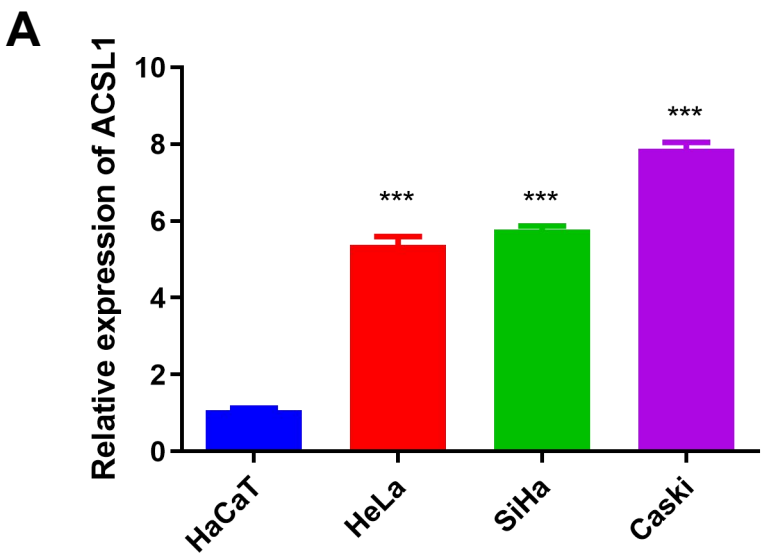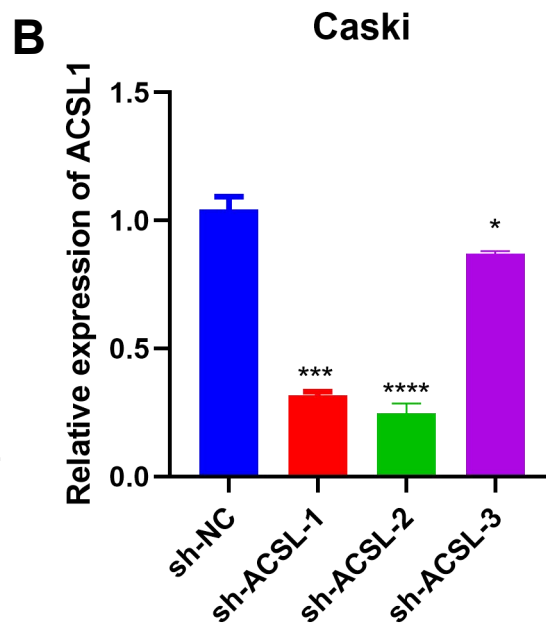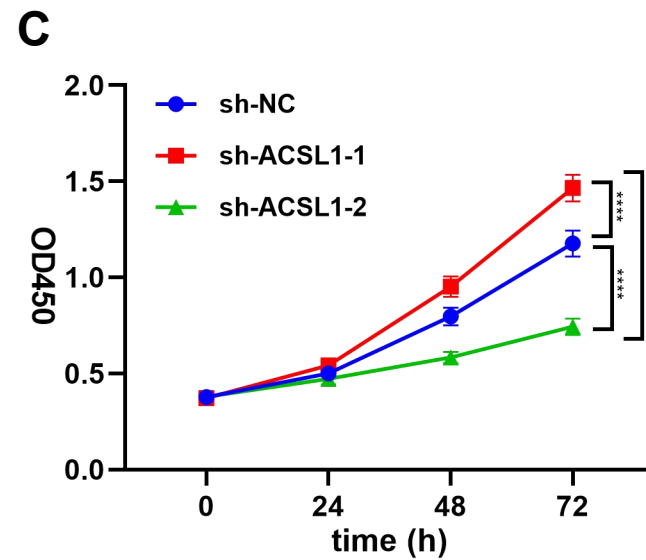

Supplement: Data_Sheet_1.ZIP [file Data_Sheet_1.ZIP]

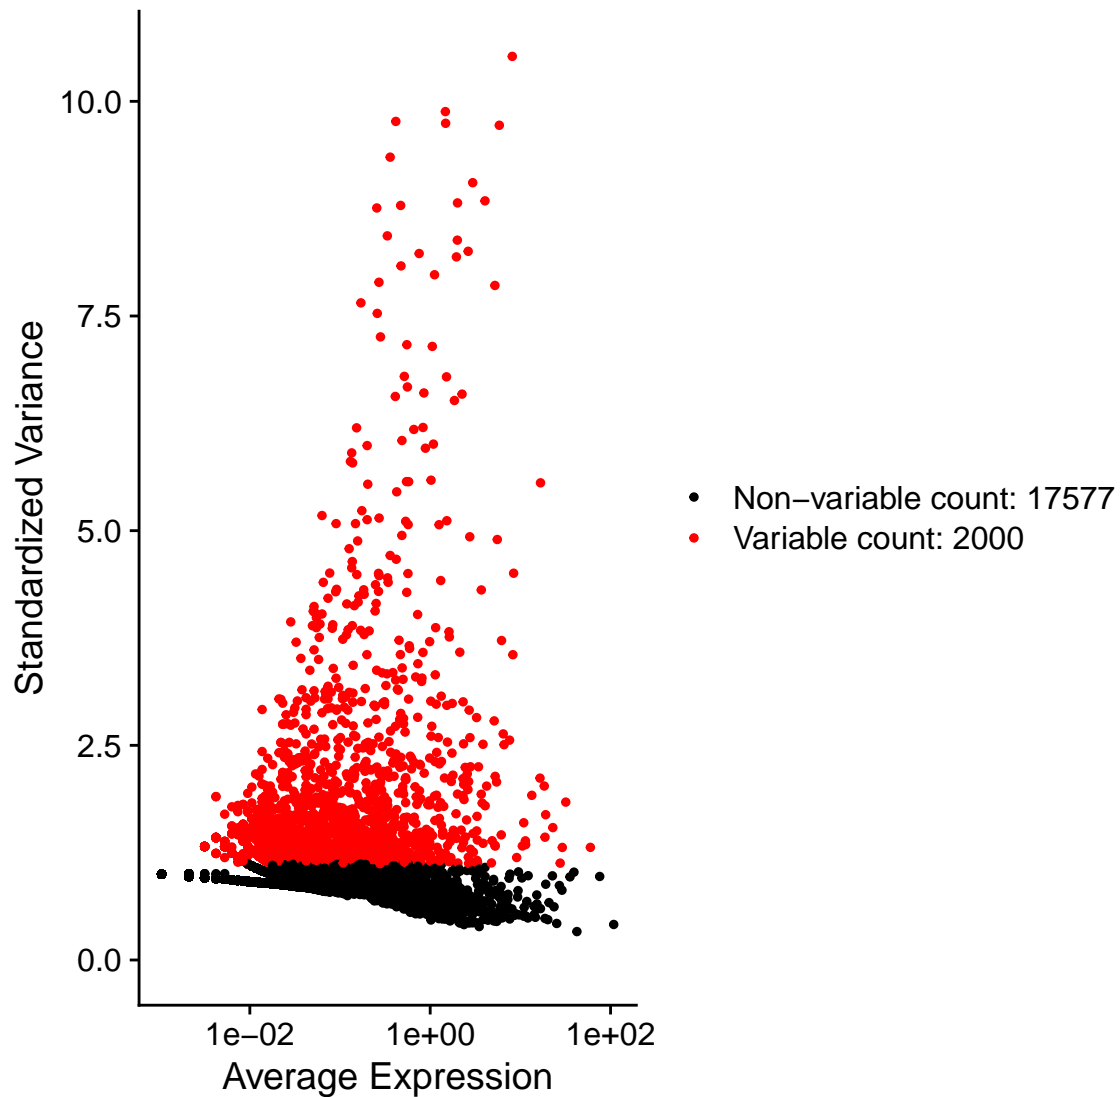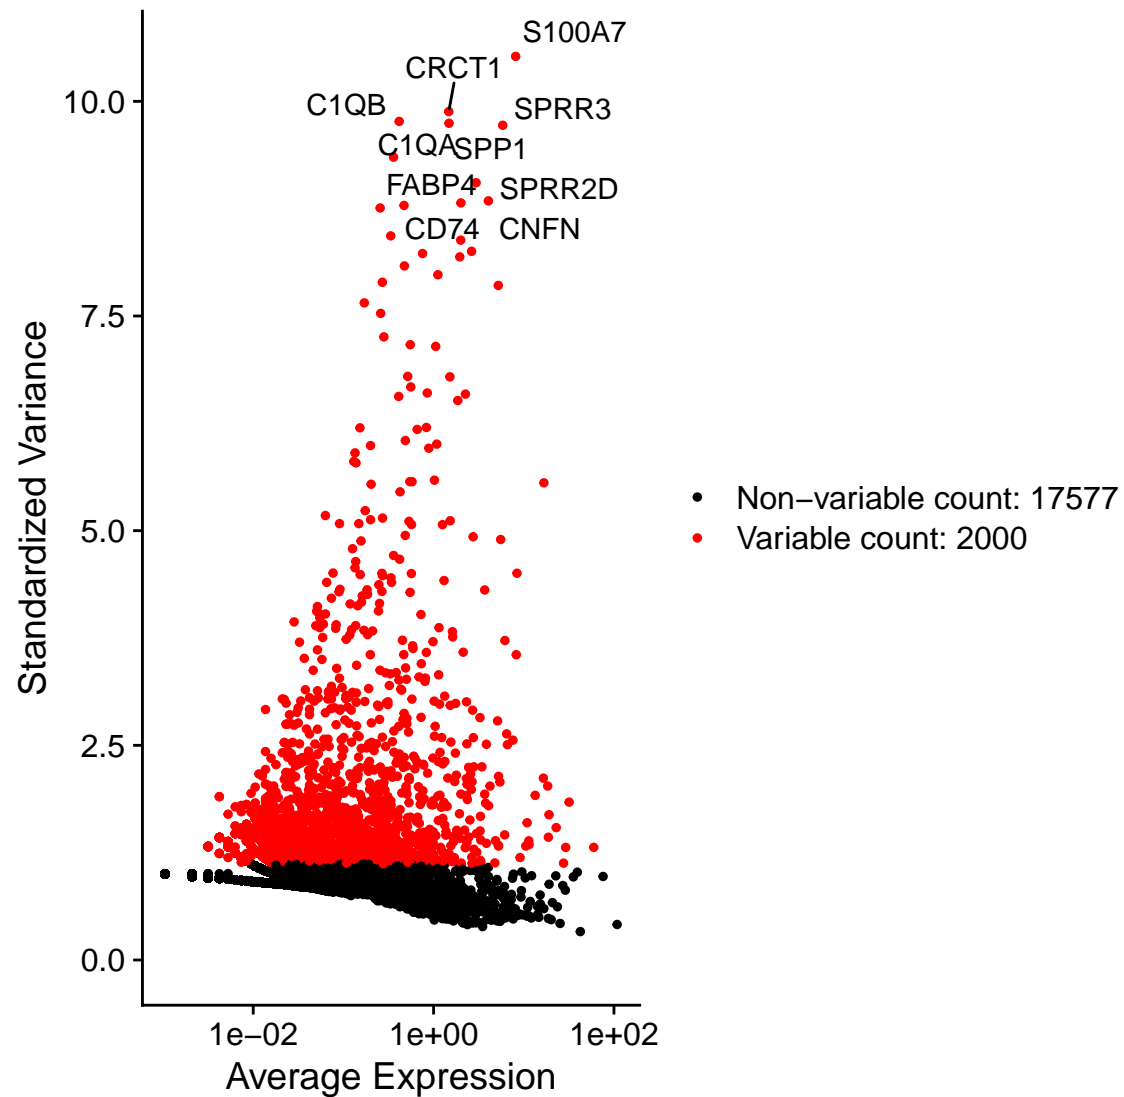

Supplement: Data_Sheet_1.ZIP [file Data_Sheet_1.ZIP]

## ZNF502

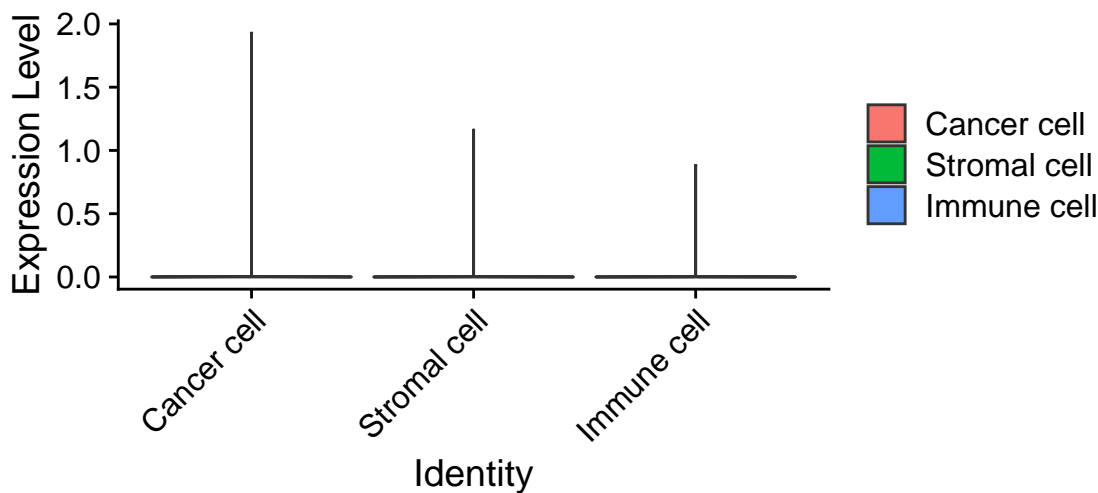

## KCNN4

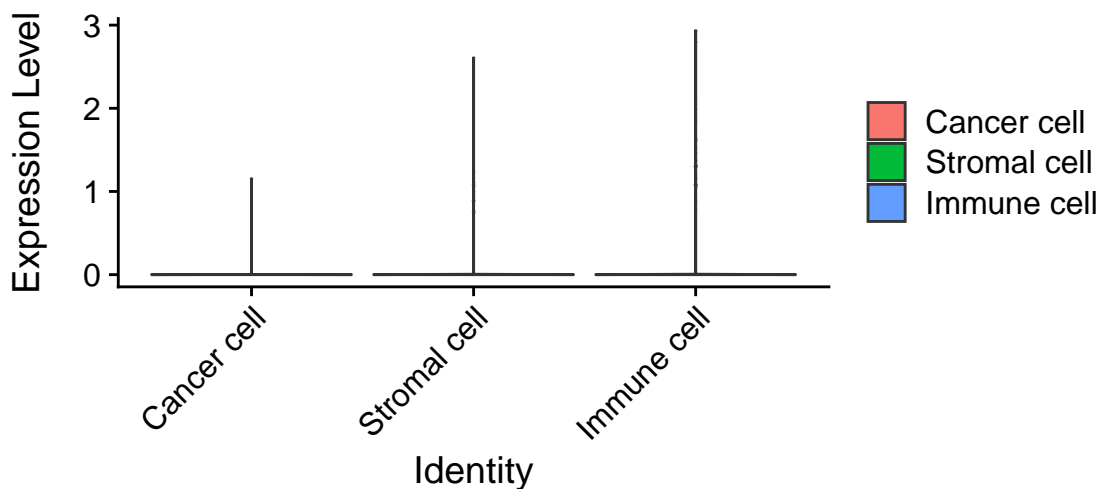

## FAM117A

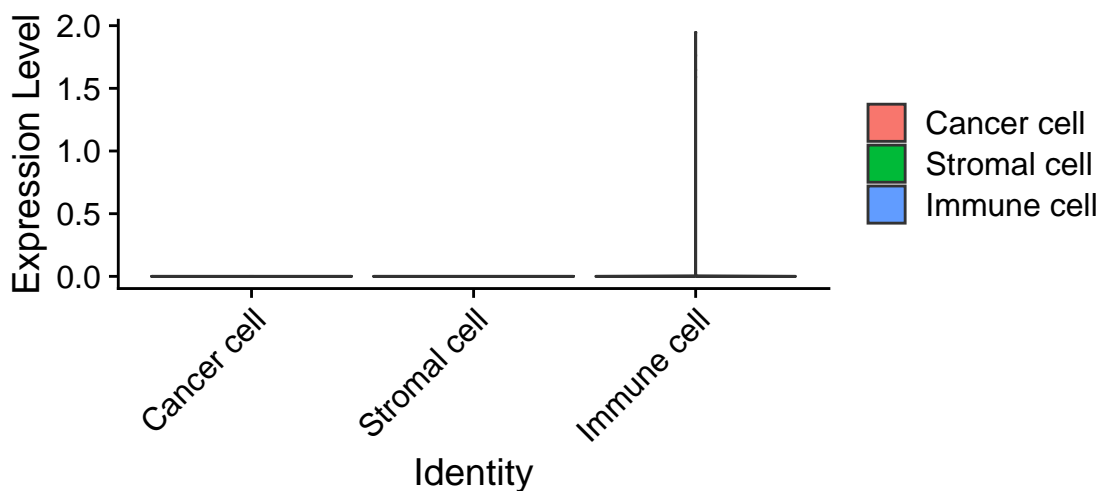

## MYEF2

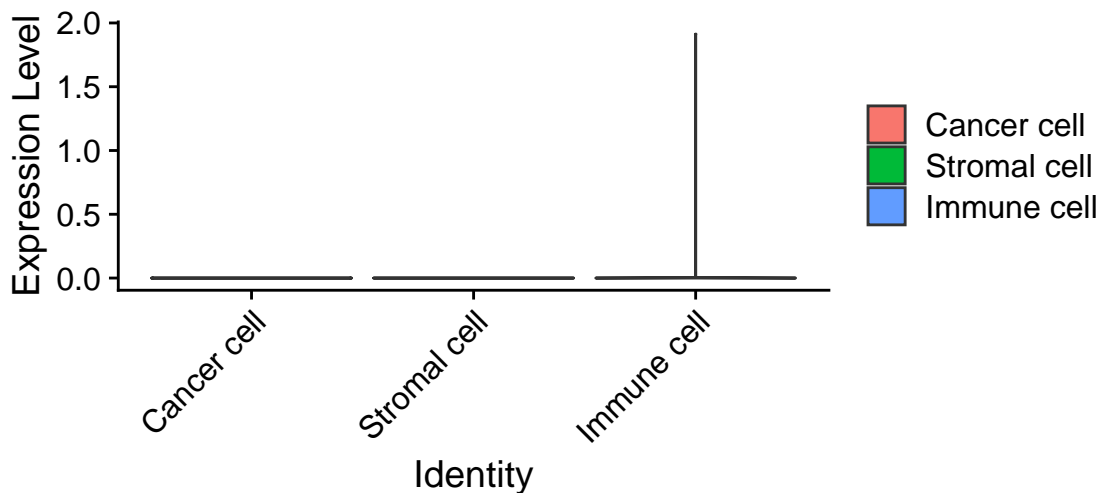

Supplement: Data_Sheet_1.ZIP [file Data_Sheet_1.ZIP]

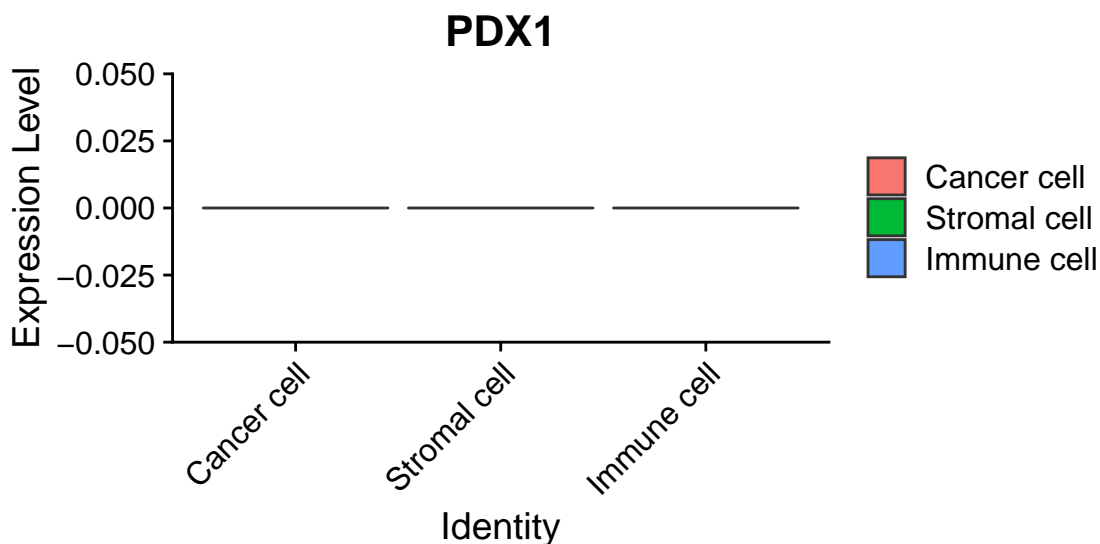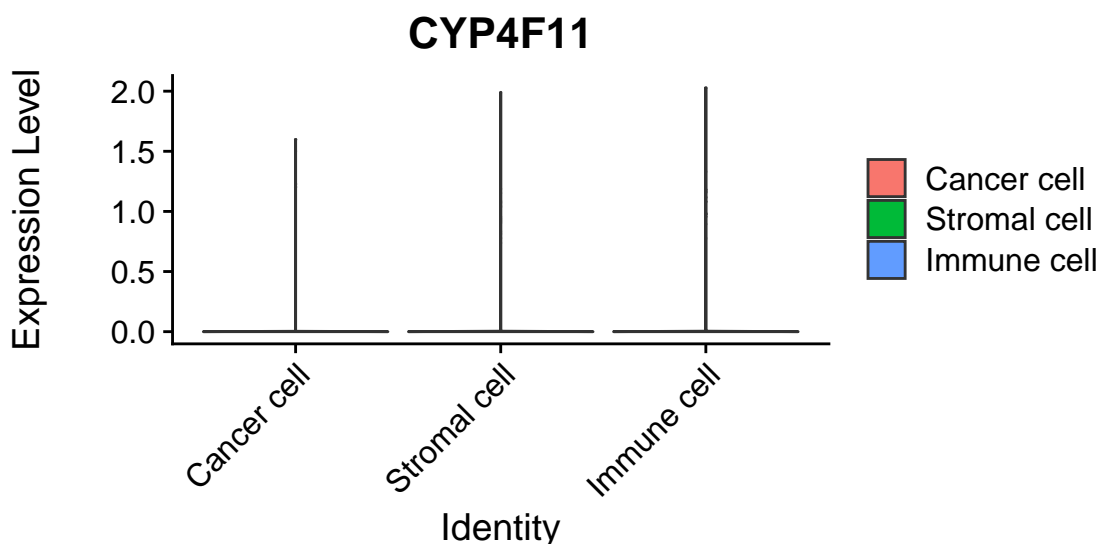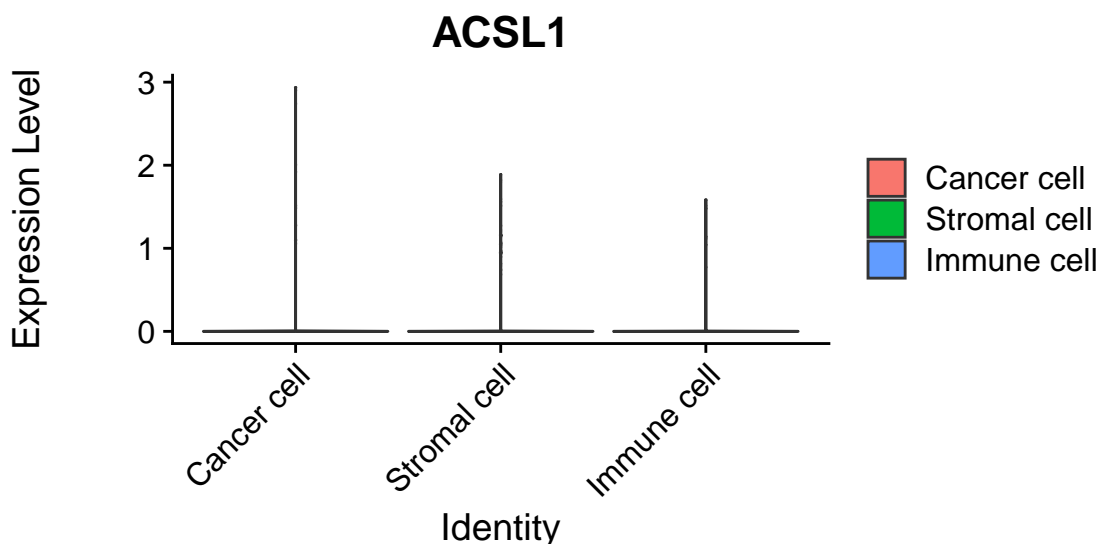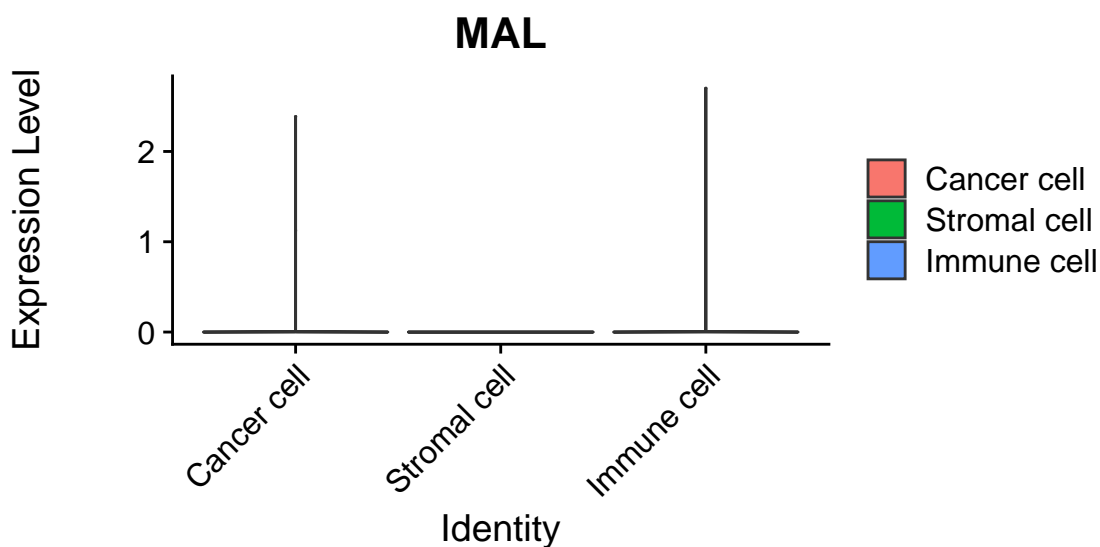

Supplement: Data_Sheet_1.ZIP [file Data_Sheet_1.ZIP]

**nFeature\_RNA**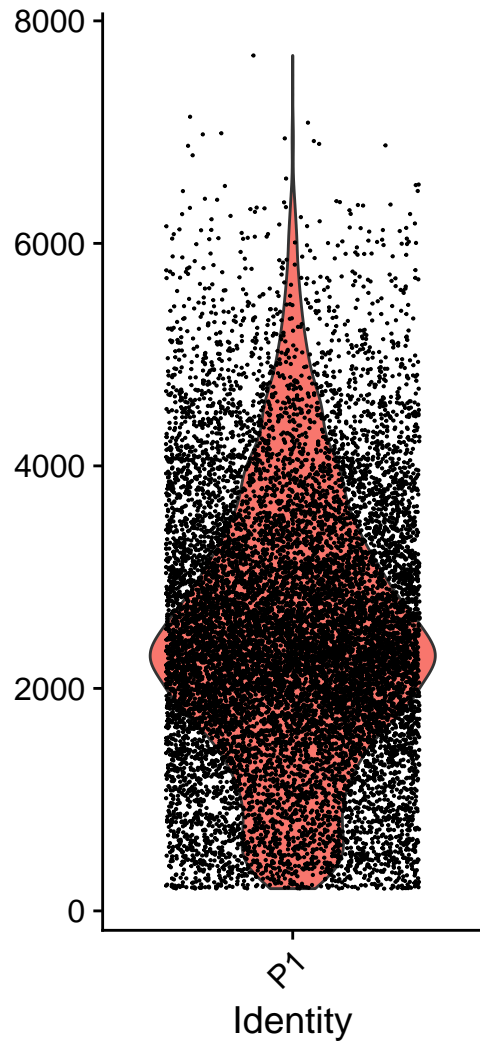**nCount\_RNA**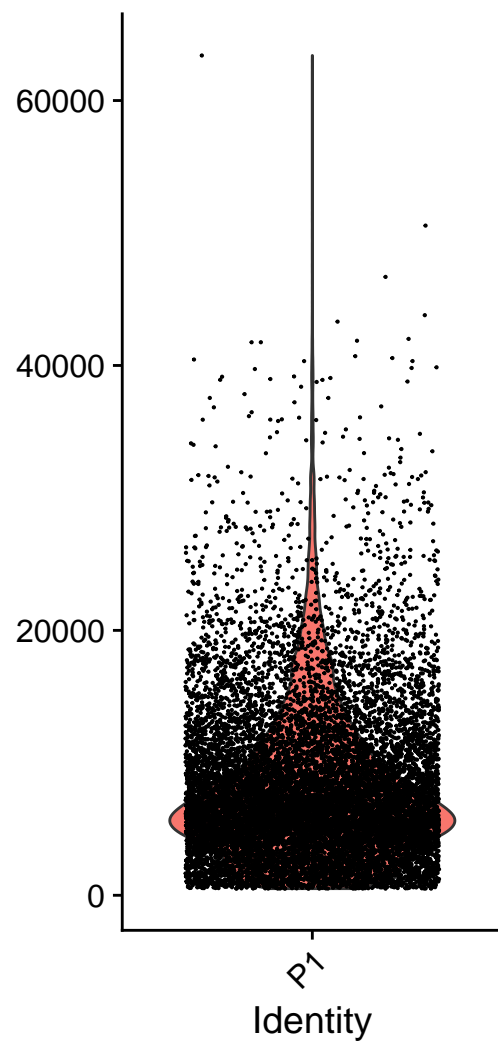**percent.HB**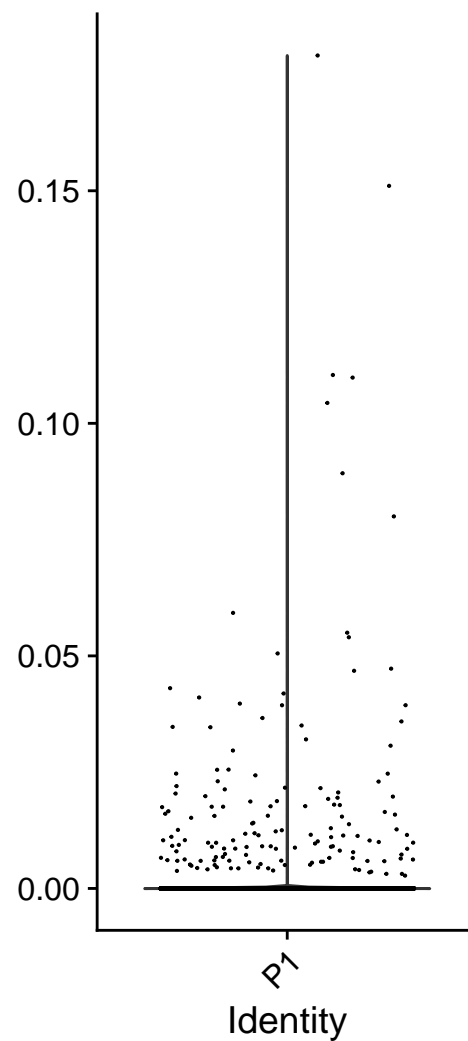**percent.MT**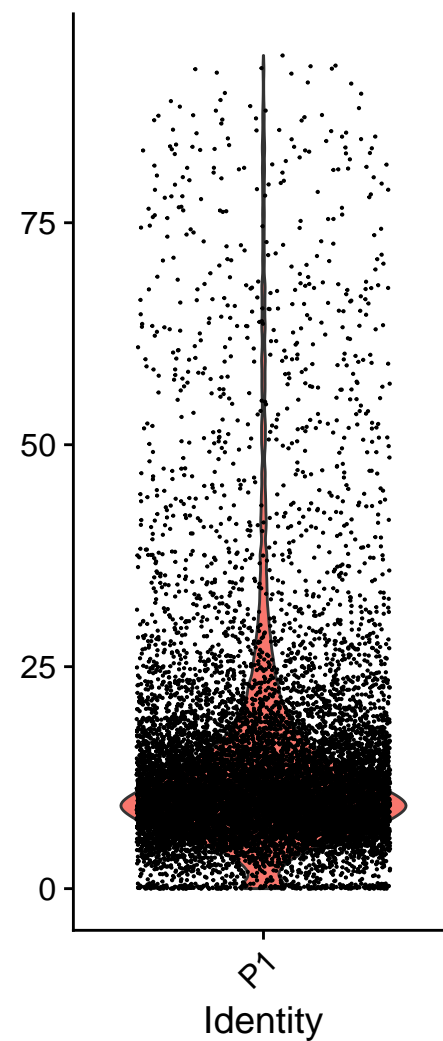**percent.Ribosome**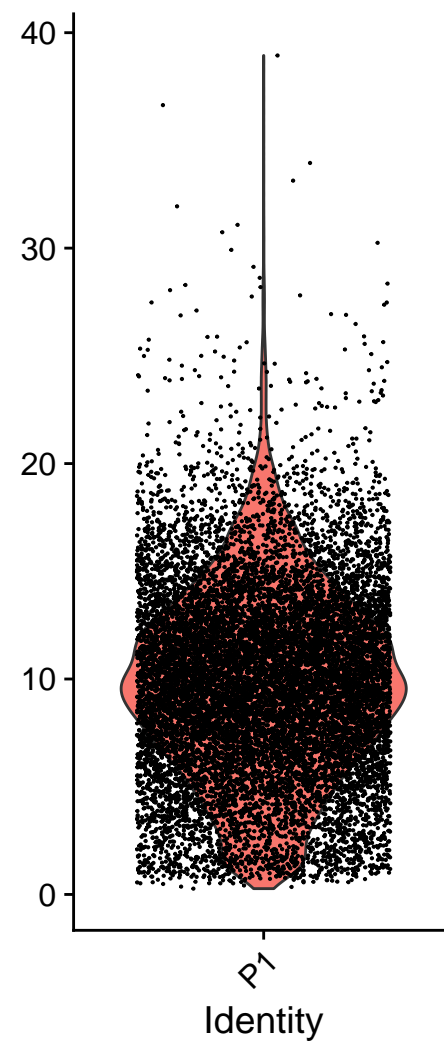

Supplement: Data_Sheet_1.ZIP [file Data_Sheet_1.ZIP]

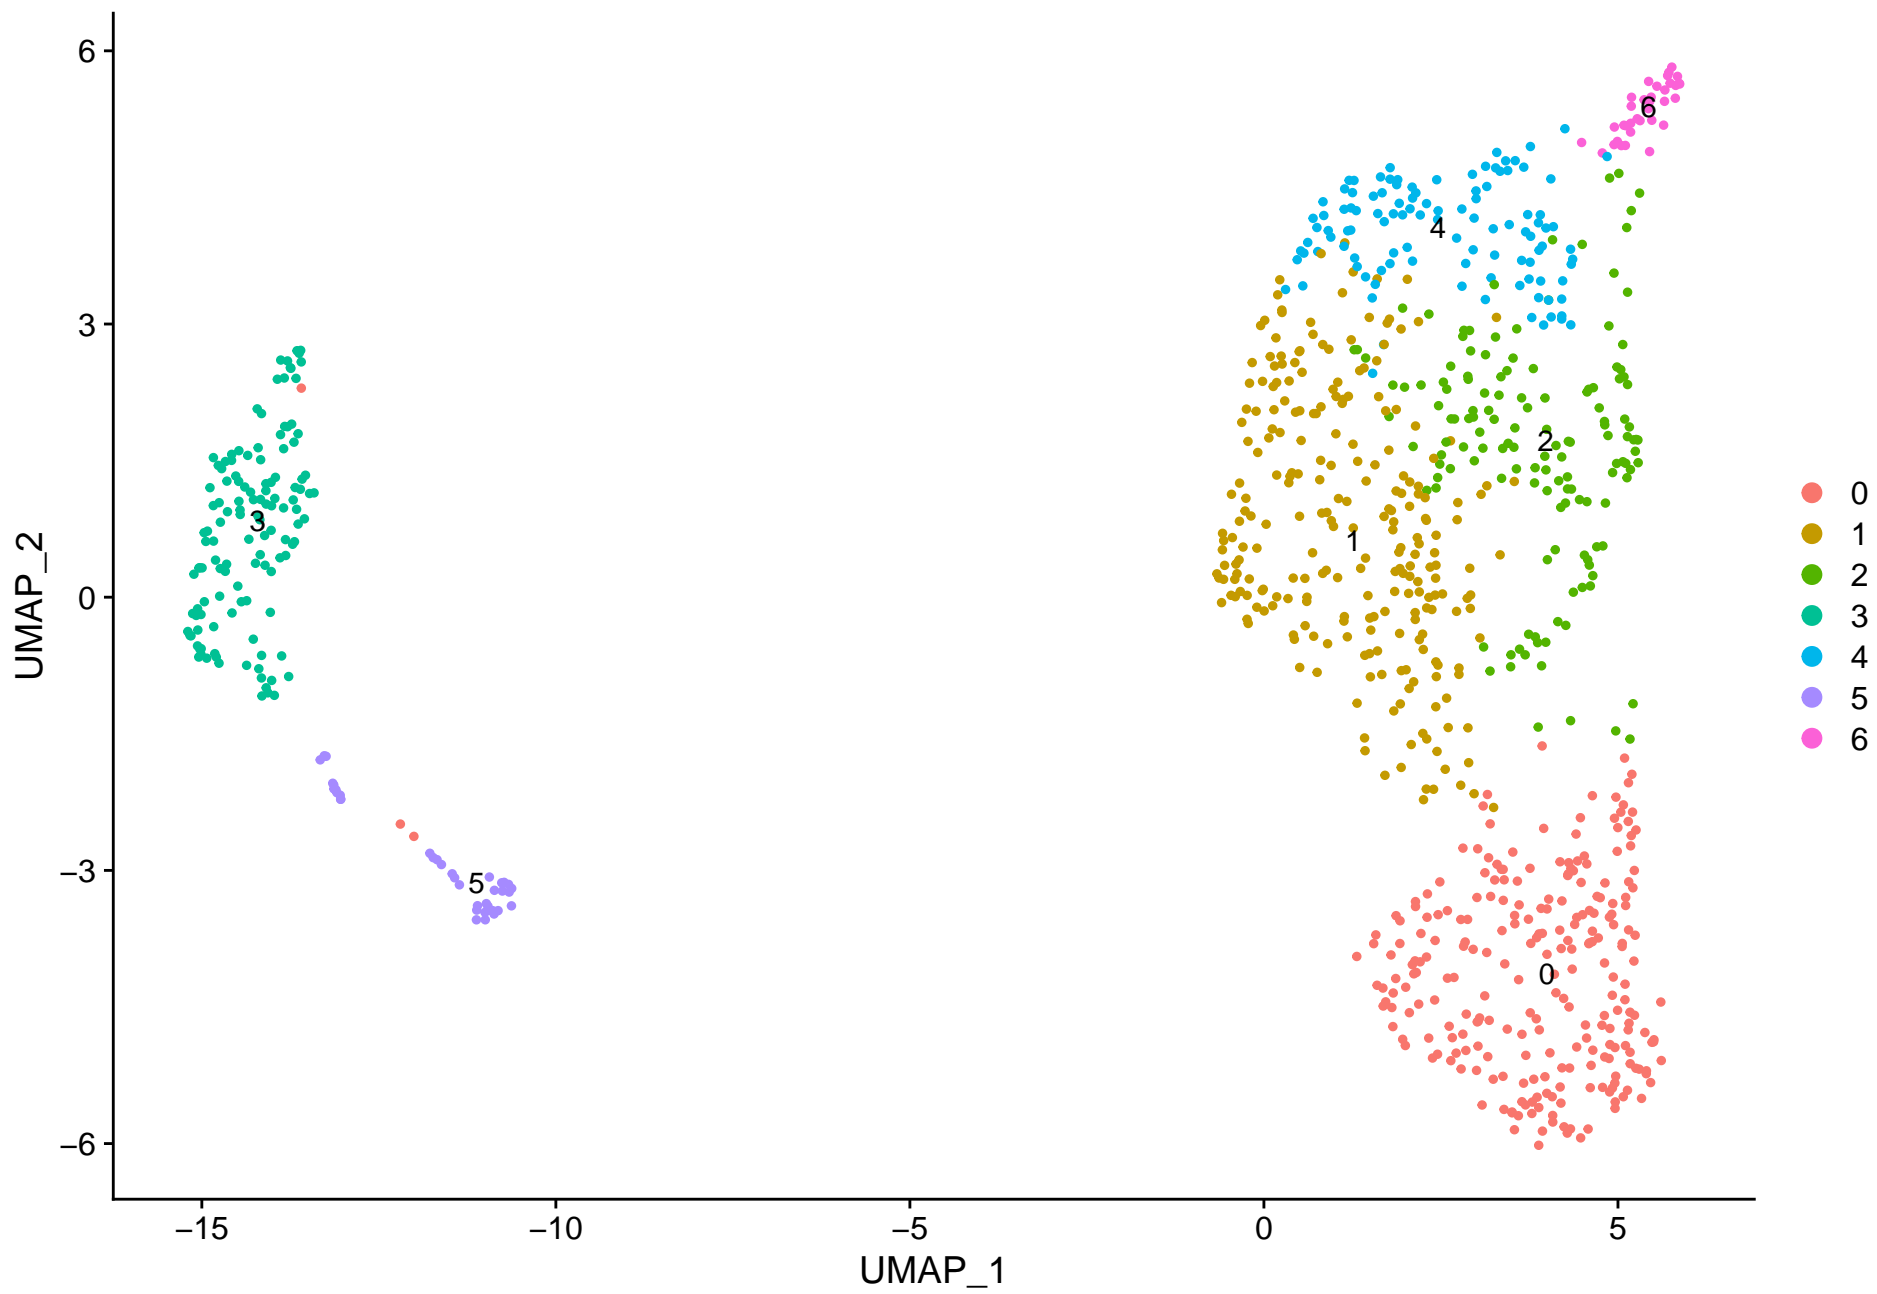

Supplement: Data_Sheet_1.ZIP [file Data_Sheet_1.ZIP]
